# Supplementary material for: Preimplantation development regulatory pathway construction through a text-mining approach
Source: PubMed Central journal article supplement (PMC3287586; doi:10.1186/1471-2164-12-s4-s3), 2011-12-22
Supplement: 1471-2164-12-S4-S3-S1.pdf [file 1471-2164-12-S4-S3-S1.pdf]

CLUSTERS

| <b>symbol CTCFL (BORIS)</b> |        |
|-----------------------------|--------|
| A2APF3                      | 10090  |
| A5GFN3                      | 9823   |
| B0WNM1                      | 7176   |
| B0WNM2                      | 7176   |
| B1H2R4                      | 8364   |
| B2CMK7                      | 9315   |
| B2CMK8                      | 9258   |
| B2CMK9                      | 103695 |
| B2CML1                      | 9315   |
| B4J365                      | 7222   |
| B4LFC4                      | 7244   |
| B4MLE6                      | 7260   |
| B4PK64                      | 7245   |
| B4QKD1                      | 7240   |
| B6PZY1                      | 7739   |
| B9EKP6                      | 10090  |
| P49711                      | 9606   |
| Q08705                      | 9031   |
| Q08DH9                      | 9913   |
| Q16EW4                      | 7159   |
| Q3Y6S0                      | 10090  |
| Q4H2H9                      | 7719   |
| Q4H2I0                      | 7719   |
| Q4KR73                      | 7159   |
| Q4SIG6                      | 99883  |
| Q53XI7                      | 9606   |
| Q61164                      | 10090  |
| Q6JAA4                      | 7955   |
| Q6PF79                      | 8355   |
| Q8NI51                      | 9606   |
| Q8TA44                      | 7227   |
| Q8WPX1                      | 7656   |
| Q9DDQ9                      | 8355   |
| Q9R1D1                      | 10116  |
| Q9VS55                      | 7227   |

| <b>symbol Zfp42 (REX1)</b> |       |
|----------------------------|-------|
| P22227                     | 10090 |
| Q96MM3                     | 9606  |

| <b>symbol LAMB3</b> |       |
|---------------------|-------|
| Q13751              | 9606  |
| A2VDM1              | 9913  |
| Q91V90              | 10090 |
| Q61087              | 10090 |

| <b>symbol DPPA2 (ECSA)</b> |       |
|----------------------------|-------|
| Q7Z7J5                     | 9606  |
| Q9CWHO                     | 10090 |
| B2RQ54                     | 10090 |

| <b>symbol SNAI1</b> |       |
|---------------------|-------|
| O95863              | 9606  |
| Q6AY35              | 10116 |
| Q02085              | 10090 |
| Q4FK48              | 10090 |
| Q6JBR3              | 45264 |
| B2R842              | 9606  |
| B5X301              | 8030  |
| P19382              | 8355  |
| Q4SLL9              | 99883 |

| <b>symbol HAND1</b> |       |
|---------------------|-------|
| O96004              | 9606  |
| Q0VCE2              | 9913  |
| P97832              | 10116 |
| P57100              | 9986  |
| Q64279              | 10090 |
| Q5SQG1              | 10090 |
| Q80UL7              | 10090 |
| Q58L58              | 9823  |
| Q28555              | 9940  |
| Q28JA1              | 8364  |
| Q90691              | 9031  |
| O73615              | 8355  |
| B7ZRJ2              | 8355  |
| Q4SPY5              | 99883 |
| Q4H3E6              | 7719  |
| Q75UU2              | 51511 |
| A7S670              | 45351 |
| P61295              | 10116 |
| P61296              | 9606  |
| Q29CX1              | 46245 |
| Q5XJD8              | 7955  |
| Q61039              | 10090 |
| Q90690              | 9031  |
| Q9VL05              | 7227  |
| A4QNK1              | 8364  |
| BOBLY7              | 8355  |
| B6ECG9              | 9606  |
| B6KXY3              | 7739  |
| P57101              | 8355  |
| Q9EPN2              | 10090 |
| B3N962              | 7220  |
| B4G7J0              | 7234  |
| B4HWJ7              | 7238  |
| B4KJF8              | 7230  |
| B4NZ86              | 7245  |
| B4Q8S6              | 7240  |
| A2BDM6              | 7955  |
| P57102              | 7955  |

| <b>symbol Sap18</b> |        |
|---------------------|--------|
| O55128              | 10090  |
| Q3MHS8              | 10116  |
| Q3T022              | 9913   |
| Q5RDT5              | 9601   |
| O00422              | 9606   |
| B2R494              | 9606   |
| Q90ZH5              | 9031   |
| B5G450              | 59729  |
| B5G461              | 59729  |
| Q28FL5              | 8364   |
| Q6PC41              | 7955   |
| Q5EAY9              | 8355   |
| Q4SEE6              | 99883  |
| B5XE12              | 8030   |
| B9EQ61              | 8030   |
| B9EQ87              | 8030   |
| Q09JJ5              | 34602  |
| B6P369              | 7739   |
| B4QX67              | 7240   |
| B4PR29              | 7245   |
| B3P0Z2              | 7220   |
| Q9VEX9              | 7227   |
| B4HLC7              | 7238   |
| B4GMJ9              | 7234   |
| B3LZX9              | 7217   |
| B4KA04              | 7230   |
| B4NL01              | 7260   |
| B4LY00              | 7244   |
| B4JG20              | 7222   |
| Q294V7              | 46245  |
| Q16GI2              | 7159   |
| A7RY60              | 45351  |
| Q7PR28              | 7165   |
| B0XBD8              | 7176   |
| B0XKQ7              | 7176   |
| A8Q2P3              | 6279   |
| B3RYA5              | 10228  |
| Q09250              | 6239   |
| Q5XUB8              | 223852 |
| Q5UEN2              | 223852 |
| Q5DEW0              | 6182   |
| Q1E366              | 5501   |
| Q4FZH3              | 10090  |

| <b>symbol DPPA5 (ESG1)</b> |       |
|----------------------------|-------|
| A6NC42                     | 9606  |
| B7NZC1                     | 9986  |
| Q9CQS7                     | 10090 |
| P85965                     | 10090 |

## CLUSTERS

| symbol DPPA4 |       |
|--------------|-------|
| Q7L190       | 9606  |
| Q8CCG4       | 10090 |
| Q9CWG7       | 10090 |
| B7Z5Q7       | 9606  |

| symbol 1700011E24Rik (GSE) |       |
|----------------------------|-------|
| Q9DAG5                     | 10090 |
| Q8N801                     | 9606  |
| B6LAL7                     | 7739  |
| B6PLG8                     | 7739  |
| B3RJY3                     | 10228 |

| symbol GATA2 |        |
|--------------|--------|
| A7RFY2       | 45351  |
| A8Q0N5       | 6279   |
| A9ZND4       | 138676 |
| B0X8S3       | 7176   |
| B2DBE1       | 10116  |
| B3DGG5       | 7955   |
| B3LZW4       | 7217   |
| B3NZW9       | 7220   |
| B3S690       | 10228  |
| B4G4Y3       | 7234   |
| B4HLP8       | 7238   |
| B4JF53       | 7222   |
| B4M159       | 7244   |
| B4NJ90       | 7260   |
| B4PSL4       | 7245   |
| B6LGL9       | 7739   |
| B7WNQ9       | 9606   |
| B7Z0V4       | 7227   |
| B8PJZ6       | 561896 |
| O09100       | 10090  |
| O77156       | 7668   |
| P15976       | 9606   |
| P17678       | 9031   |
| P17679       | 10090  |
| P23769       | 9606   |
| P23770       | 8355   |
| P23771       | 9606   |
| P23772       | 10090  |
| P23773       | 8355   |
| P23824       | 9031   |
| P23825       | 9031   |
| P43429       | 10116  |
| P91623       | 7227   |
| Q08DV0       | 9913   |
| Q0ZHH4       | 9823   |
| Q172Z8       | 7159   |
| Q299A5       | 46245  |
| Q2TAR8       | 8355   |

| symbol GATA2 |       |
|--------------|-------|
| Q32NN9       | 8355  |
| Q3B845       | 10090 |
| Q3TZD6       | 10090 |
| Q3TZS0       | 10090 |
| Q3U0R5       | 10090 |
| Q3U223       | 10090 |
| Q3U320       | 10090 |
| Q3UIH9       | 10090 |
| Q53YE0       | 9606  |
| Q560R5       | 5207  |
| Q59IU1       | 8090  |
| Q5KA62       | 5207  |
| Q5KPR4       | 5207  |
| Q5KST7       | 8090  |
| Q5VWG7       | 9606  |
| Q5VWG8       | 9606  |
| Q60I22       | 7764  |
| Q6DG89       | 7955  |
| Q6DIQ6       | 8364  |
| Q6S5H3       | 45351 |
| Q7T3G1       | 7955  |
| Q7TMX8       | 10090 |
| Q865U9       | 9823  |
| Q8QFW5       | 33514 |
| Q91428       | 7955  |
| Q924Y4       | 10116 |
| Q96BH0       | 9606  |
| Q96BH8       | 9606  |
| Q99NH5       | 10116 |
| Q9DBY9       | 10090 |
| Q9DC59       | 10090 |

| symbol WNT9A |       |
|--------------|-------|
| O14904       | 9606  |
| Q8R5M2       | 10090 |
| Q3L251       | 9031  |
| O42280       | 9031  |
| B6V3E1       | 7955  |
| Q0P406       | 7955  |
| B6L7F0       | 7739  |
| B6NS64       | 7739  |
| B7PV27       | 6945  |
| O14905       | 9606  |
| Q8C718       | 10090 |
| A4ZGP2       | 8364  |
| B6V3E2       | 7955  |
| O35468       | 10090 |
| Q2TBA6       | 10090 |
| Q6NZE9       | 10090 |
| Q6ZS96       | 9606  |
| Q6ZSP0       | 9606  |

| symbol Eomes |       |
|--------------|-------|
| O54839       | 10090 |
| Q9JL1        | 10090 |
| Q52KJ1       | 10090 |
| Q8BN22       | 10090 |
| O95936       | 9606  |
| B3DL32       | 8364  |
| Q5XH32       | 8355  |
| P79944       | 8355  |
| A0JMS3       | 8355  |
| Q9PVX6       | 8330  |
| Q98TU2       | 7955  |
| Q9DDU3       | 7955  |
| B2GTZ2       | 8364  |
| B7Z5W6       | 9606  |
| B7Z619       | 9606  |

| symbol LEFTY1/LEFTY2 |       |
|----------------------|-------|
| O75610               | 9606  |
| B2R7U0               | 9606  |
| O00292               | 9606  |
| B4E332               | 9606  |
| P57785               | 10090 |
| Q64280               | 10090 |
| Q52M97               | 8355  |
| Q5UCE3               | 10116 |
| Q9PW55               | 7955  |
| Q9W6I6               | 7955  |
| Q9W6I7               | 7955  |
| Q95YK6               | 51511 |
| B6LUA8               | 7739  |
| B3FNR6               | 7668  |
| Q6T265               | 7656  |
| A0A7U9               | 8255  |
| B3DLA0               | 8364  |
| A2TJL5               | 8090  |
| Q9PVN4               | 9031  |
| Q4SGU3               | 99883 |
| Q4H393               | 7719  |
| Q9DD36               | 8355  |
| Q9DFC5               | 8355  |
| Q9DFC6               | 8355  |

| symbol Gcm1 |       |
|-------------|-------|
| P70348      | 10090 |
| Q9Z288      | 10116 |
| Q9NP62      | 9606  |
| Q6UEJ0      | 9031  |
| Q7ZY38      | 8355  |
| B7QBR5      | 6945  |
| A9YWQ5      | 7654  |
| Q3UQD1      | 10090 |

## CLUSTERS

| symbol Krt18 |       |
|--------------|-------|
| P05784       | 10090 |
| A2BDA6       | 8355  |
| Q5BJY9       | 10116 |
| P05783       | 9606  |
| B2RA03       | 9606  |
| Q6P864       | 8364  |
| Q7ZTS4       | 7955  |
| Q5K2N9       | 7886  |
| Q7SYF8       | 27689 |
| O57607       | 8022  |
| Q07427       | 7957  |
| O57611       | 68454 |
| A1KQY9       | 55291 |
| Q4SRP1       | 99883 |
| Q8AWA6       | 7748  |
| Q8AWA8       | 7748  |
| Q8AWA7       | 7748  |
| A1L317       | 10090 |
| A1L595       | 9913  |
| A3KN26       | 9913  |
| A3RF35       | 9615  |
| A5A6M0       | 9598  |
| A5A6M5       | 9598  |
| A5A6M9       | 37012 |
| A5A6N2       | 9598  |
| A5A6P3       | 9598  |
| A5PJJ1       | 9913  |
| A6QNZ7       | 9913  |
| A6QP62       | 9913  |
| A6QP90       | 9913  |
| A6QQQ9       | 9913  |
| A7YWM2       | 9913  |
| B0BMG5       | 8364  |
| B6PNK6       | 7739  |
| O18740       | 9615  |
| O76009       | 9606  |
| O76011       | 9606  |
| O76013       | 9606  |
| O76014       | 9606  |
| O93256       | 9031  |
| P02533       | 9606  |
| P02535       | 10090 |
| P06394       | 9913  |
| P08727       | 9606  |
| P08728       | 9913  |
| P08730       | 10090 |
| P08778       | 8355  |
| P08779       | 9606  |
| P13645       | 9606  |
| P13646       | 9606  |
| P19001       | 10090 |

| symbol Krt18 |       |
|--------------|-------|
| P19012       | 9606  |
| P25030       | 10116 |
| P35527       | 9606  |
| P35900       | 9606  |
| Q04695       | 9606  |
| Q05AL9       | 7955  |
| Q0P5J4       | 9913  |
| Q0P5J6       | 9913  |
| Q0P5J7       | 9913  |
| Q14525       | 9606  |
| Q14532       | 9606  |
| Q148H6       | 9913  |
| Q148I8       | 9913  |
| Q148J0       | 9913  |
| Q15323       | 9606  |
| Q17QL7       | 9913  |
| Q1LXJ1       | 7955  |
| Q1LXJ7       | 7955  |
| Q1RLR3       | 7955  |
| Q2M2I5       | 9606  |
| Q2VPN9       | 8355  |
| Q497I4       | 10090 |
| Q4QR57       | 8355  |
| Q568U3       | 7955  |
| Q5XGU0       | 8355  |
| Q614I4       | 10090 |
| Q61765       | 10090 |
| Q61781       | 10090 |
| Q62168       | 10090 |
| Q63279       | 10116 |
| Q64291       | 10090 |
| Q6A162       | 9606  |
| Q6A163       | 9606  |
| Q6DDD5       | 8355  |
| Q6DG66       | 7955  |
| Q6DHB6       | 7955  |
| Q6DHU3       | 7955  |
| Q6DK80       | 8364  |
| Q6DKC7       | 8355  |
| Q6EIZ0       | 9615  |
| Q6IFU7       | 10116 |
| Q6IFU8       | 10116 |
| Q6IFU9       | 10116 |
| Q6IFV0       | 10116 |
| Q6IFV1       | 10116 |
| Q6IFV3       | 10116 |
| Q6IFV4       | 10116 |
| Q6IFV5       | 10116 |
| Q6IFV6       | 10116 |
| Q6IFV7       | 10116 |
| Q6IFV8       | 10116 |

| symbol Krt18 |       |
|--------------|-------|
| Q6IFV9       | 10116 |
| Q6IFW0       | 10116 |
| Q6IFW1       | 10116 |
| Q6IFW2       | 10116 |
| Q6IFW3       | 10116 |
| Q6IFW4       | 10116 |
| Q6IFW5       | 10116 |
| Q6IFW6       | 10116 |
| Q6IFW8       | 10116 |
| Q6IFX0       | 10116 |
| Q6IFX2       | 10090 |
| Q6IFX3       | 10090 |
| Q6IFX4       | 10090 |
| Q6IRP5       | 8355  |
| Q6P0E4       | 7955  |
| Q6P7K6       | 8364  |
| Q6PVZ1       | 9031  |
| Q6PVZ2       | 9031  |
| Q6RHW0       | 10090 |
| Q7SY65       | 8355  |
| Q7Z3Y7       | 9606  |
| Q7Z3Z0       | 9606  |
| Q7ZXE6       | 8355  |
| Q7ZYN9       | 8355  |
| Q803Y5       | 7955  |
| Q8CIS9       | 10116 |
| Q8K0Y2       | 10090 |
| Q8VCW2       | 10090 |
| Q92764       | 9606  |
| Q99456       | 9606  |
| Q99PS0       | 10090 |
| Q9C075       | 9606  |
| Q9D312       | 10090 |
| Q9D646       | 10090 |
| Q9GJW4       | 9598  |
| Q9PUB6       | 7955  |
| Q9QWL7       | 10090 |
| Q9Z2K1       | 10090 |
| Q9Z320       | 10090 |
| A1A4E9       | 9606  |
| A4UYK3       | 28829 |
| A5A6P4       | 37012 |
| A6BLY7       | 10090 |
| A6H712       | 9913  |
| A7TUG6       | 8400  |
| A8K2H9       | 9606  |
| A8K488       | 9606  |
| B0BMH1       | 8364  |
| B0BMI0       | 8364  |
| B0BMI8       | 8364  |
| B0LKN9       | 9940  |

CLUSTERS

| symbol Krt18 |       |
|--------------|-------|
| B1AQ77       | 10090 |
| B1AQ78       | 10090 |
| B2GUG8       | 8364  |
| B2R9E0       | 9606  |
| B2RU72       | 10090 |
| B2ZHC2       | 10141 |
| B3DM07       | 8364  |
| B3KVF5       | 9606  |
| B7ZRD4       | 8355  |
| B7ZSA0       | 8355  |
| O77727       | 9940  |
| P02537       | 8355  |
| P05781       | 8355  |
| P51856       | 9310  |
| Q05AX6       | 8355  |
| Q1LXJ0       | 7955  |
| Q3SYP5       | 10090 |
| Q3TRJ4       | 10090 |
| Q3ZAW8       | 10090 |
| Q505L4       | 8355  |
| Q6IFW9       | 10116 |
| Q6IFX1       | 10116 |
| Q6R649       | 9925  |
| Q6R650       | 9925  |
| Q7Z3Y8       | 9606  |
| Q7Z3Y9       | 9606  |
| Q8AV12       | 8355  |
| Q8JFQ6       | 8022  |
| Q98UJ1       | 8355  |
| Q98UJ2       | 8355  |
| Q9BGM5       | 9940  |
| Q9EQD6       | 10090 |
| Q9EQD7       | 10090 |
| B2GU21       | 8364  |
| Q1LXJ8       | 7955  |
| Q28IM9       | 8364  |
| Q6IFW7       | 10116 |
| Q6ZPD6       | 9606  |
| B0LKP0       | 9940  |
| B0LKP2       | 9940  |
| B1AQ75       | 10090 |
| B1ATJ5       | 10090 |
| B6Z1W3       | 28377 |
| B7ZM39       | 9606  |
| P02534       | 9940  |
| P25690       | 9940  |
| Q148N4       | 10090 |
| Q61897       | 10090 |
| Q6R651       | 9925  |
| Q9BGM6       | 9940  |
| Q9GJW5       | 9593  |

| symbol Krt18 |       |
|--------------|-------|
| A2A513       | 10090 |
| A2VDC4       | 8355  |
| B0UY50       | 7955  |
| B6Z1W4       | 28377 |
| P08777       | 8355  |
| Q07426       | 7957  |
| Q0X0A4       | 8355  |
| Q7SYG4       | 27689 |
| Q7T0X6       | 8355  |
| Q90303       | 7957  |
| Q9NG14       | 7740  |
| Q9NG16       | 7740  |
| Q9XYG9       | 7739  |
| A2RRM5       | 9606  |
| B0LKP1       | 9940  |
| O76015       | 9606  |
| Q5K2N2       | 7886  |
| Q5K2P1       | 7886  |
| Q5K2P4       | 7886  |
| Q5K2P5       | 7886  |
| Q5K2P6       | 7886  |
| P08802       | 8355  |
| A4UYK4       | 28829 |
| B1AQ76       | 10090 |
| Q4RZM7       | 99883 |
| Q5R8S9       | 9601  |
| Q9PWD8       | 7955  |
| A1L222       | 7955  |
| A2SXI5       | 8267  |
| Q1LXJ2       | 7955  |
| Q1LXJ9       | 7955  |
| Q1LXK0       | 7955  |
| Q1RM74       | 7955  |
| Q3ULX3       | 10090 |
| Q544I8       | 10090 |
| Q8CB30       | 10090 |
| Q8TC04       | 9606  |
| B4DL17       | 9606  |
| Q28FN7       | 8364  |
| Q2KI75       | 9913  |
| Q8CCX5       | 10090 |
| Q8N1A0       | 9606  |

| symbol Mybl2 |       |
|--------------|-------|
| P48972       | 10090 |
| P10244       | 9606  |
| B2RBS5       | 9606  |
| B7Z8D9       | 9606  |
| Q17QY0       | 9913  |
| Q03237       | 9031  |
| P52551       | 8355  |
| Q6NRE6       | 8355  |
| Q4KMF7       | 7955  |
| Q6DRH7       | 7955  |
| A2A5P2       | 10090 |
| P10243       | 9606  |
| P51960       | 10090 |
| P52550       | 9031  |
| Q3ZB50       | 10090 |
| Q495F9       | 9606  |
| Q495G0       | 9606  |

| symbol Jak1 |       |
|-------------|-------|
| P52332      | 10090 |
| B1ASP2      | 10090 |
| Q3URU8      | 10090 |
| Q3U8P8      | 10090 |
| P23458      | 9606  |
| Q4LDX3      | 9606  |
| Q9TTJ1      | 9823  |
| Q9PWM9      | 9031  |
| Q6DDJ0      | 8355  |
| Q7ZU16      | 7955  |
| O12990      | 7955  |
| Q09178      | 7962  |
| O57612      | 47145 |
| B4H0H6      | 7234  |
| B9EQC7      | 8030  |

| symbol DAB2 |       |
|-------------|-------|
| P98082      | 9606  |
| P98078      | 10090 |
| O88797      | 10116 |
| Q5RF13      | 9601  |
| B5X191      | 8030  |
| Q4S2B9      | 99883 |
| Q6PAY5      | 8355  |
| A1XI03      | 8355  |
| Q6PAV7      | 8355  |
| B8A566      | 7955  |
| Q7SYH8      | 7955  |
| Q6P0K3      | 7955  |
| A8Q553      | 6279  |
| B2RAW0      | 9606  |
| B3S3X8      | 10228 |

## CLUSTERS

| symbol DNMT1 |        |
|--------------|--------|
| P26358       | 9606   |
| Q24K09       | 9913   |
| Q4TTV6       | 9823   |
| Q865V5       | 9940   |
| P13864       | 10090  |
| Q7TSJ0       | 10090  |
| Q3UHZ3       | 10090  |
| Q9Z330       | 10116  |
| Q8MJ28       | 13616  |
| Q27746       | 7656   |
| Q8IAJ7       | 7656   |
| O42803       | 5191   |
| O42731       | 5191   |
| A8NEZ8       | 240176 |
| A8N3W7       | 240176 |
| B2AKW2       | 5145   |
| A7ERM2       | 325569 |
| B0B066       | 5147   |
| Q96W73       | 5141   |
| Q1E6Q1       | 5501   |
| Q0UYX5       | 13684  |
| B6Q1V3       | 441960 |
| B7ZLW6       | 9606   |
| Q92072       | 9031   |
| Q6GQH0       | 8355   |
| P79922       | 8355   |
| B1WBA5       | 8355   |
| Q9I8X6       | 96538  |
| B6NJV2       | 7739   |
| Q2GQX6       | 38033  |
| A1DLL2       | 331117 |
| A2R4V8       | 425011 |
| A4RBT3       | 148305 |
| A4RDS0       | 148305 |
| A6RJV4       | 332648 |
| A6S0I6       | 332648 |
| A7E505       | 325569 |
| A7UVZ2       | 5141   |
| B0CNH7       | 486041 |
| B0CPJ9       | 486041 |
| B0CSP1       | 486041 |
| B2AUK7       | 5145   |
| B3MVH6       | 7217   |
| B3RL43       | 10228  |
| B6L3A0       | 7739   |
| B6PIX4       | 7739   |
| O14717       | 9606   |
| O55055       | 10090  |
| P40999       | 4896   |
| Q0E8R4       | 7227   |
| Q177E1       | 7159   |

| symbol DNMT1 |        |
|--------------|--------|
| Q29NK7       | 46245  |
| Q2KFY7       | 242507 |
| Q2U949       | 5062   |
| Q4G073       | 10116  |
| Q4W5Z2       | 9031   |
| Q4WD73       | 5085   |
| Q588C1       | 7955   |
| Q6DIS0       | 8364   |
| Q7YS61       | 9913   |
| Q7ZTJ0       | 8355   |
| Q876R1       | 162425 |
| Q8QGB8       | 7955   |
| A1CMG6       | 5057   |
| BOYD76       | 451804 |
| Q0CGV2       | 341663 |
| Q8NJV9       | 5142   |
| Q8NJW0       | 5141   |
| Q9HF18       | 5141   |
| B3DKL6       | 7955   |
| B3DKL7       | 7955   |
| B6VB52       | 7957   |
| Q8IAJ2       | 7656   |
| Q8IAJ3       | 7656   |
| Q8IAJ4       | 7656   |
| BOXCF5       | 7176   |
| BOYJ02       | 9606   |
| BOYJ03       | 9606   |
| B4DQZ2       | 9606   |
| B7Z1Y7       | 9606   |
| Q29R90       | 7955   |
| Q5I0V6       | 10090  |
| Q8C7F0       | 10090  |
| Q8CE27       | 10090  |
| B6K0C0       | 402676 |
| B3N3X2       | 7220   |
| B4GQK4       | 7234   |
| B4IE64       | 7238   |
| B4JBL7       | 7222   |
| B4KI02       | 7230   |
| B4LSF6       | 7244   |
| B4P1Y6       | 7245   |
| B4Q3Q2       | 7240   |
| Q8MSZ1       | 7227   |
| Q9U6H7       | 7227   |
| Q9VKB3       | 7227   |

| symbol Dsc2 |       |
|-------------|-------|
| P55292      | 10090 |
| Q3T1K6      | 10116 |
| Q02487      | 9606  |
| A9X9K9      | 9606  |
| A8K2P8      | 9606  |
| A9X9L0      | 9606  |
| B4DLJ5      | 9606  |
| Q63HM4      | 9606  |
| Q544V1      | 10090 |
| Q6PEU5      | 10090 |
| B3DLX7      | 8364  |
| A6QR67      | 9913  |
| A8K6T3      | 9606  |
| P55849      | 10090 |
| P55850      | 10090 |
| Q01107      | 9913  |
| Q14574      | 9606  |
| Q32ME9      | 10090 |
| Q8C4K6      | 10090 |
| Q9HB00      | 9606  |

| symbol Nr0b1 (DAX1) |       |
|---------------------|-------|
| Q61066              | 10090 |
| P70503              | 10116 |
| Q9BG94              | 9483  |
| P79386              | 9823  |
| Q9BG93              | 9544  |
| Q9BG97              | 9598  |
| Q9BG96              | 9600  |
| P51843              | 9606  |
| Q9PTE9              | 9031  |
| Q8QGS4              | 8410  |
| A3KNP5              | 7955  |
| Q59AE8              | 13489 |
| A7BFV4              | 8090  |
| Q8AY13              | 8128  |
| Q1A7P2              | 8128  |
| Q8AUM4              | 8128  |
| B6MX29              | 7739  |
| B6PIM4              | 7739  |
| Q53ZY9              | 10090 |

CLUSTERS

| symbol RPS14 |        |
|--------------|--------|
| P62263       | 9606   |
| P62264       | 10090  |
| P62265       | 10029  |
| Q6PI76       | 8355   |
| Q5ZHW8       | 9031   |
| Q5DVH5       | 8260   |
| Q4SQ18       | 99883  |
| B5G2V9       | 59729  |
| A4IGS7       | 8364   |
| A2IBV8       | 13489  |
| Q6PDV6       | 10116  |
| Q6PBW3       | 7955   |
| B5DGX1       | 8030   |
| A9ZON4       | 173242 |
| Q90YR0       | 7998   |
| A2Q0S9       | 28829  |
| Q08699       | 6096   |
| B6L4I6       | 7739   |
| Q3T076       | 9913   |
| Q6IV88       | 155462 |
| B0Z9Q5       | 56195  |
| Q0PXX5       | 121845 |
| B4LK78       | 7244   |
| B4M2G0       | 7244   |
| B4M715       | 7244   |
| B4KU90       | 7230   |
| B4L4Q3       | 7230   |
| B4L542       | 7230   |
| B6RB78       | 91233  |
| B4JN94       | 7222   |
| B4JLX6       | 7222   |
| B4JUT2       | 7222   |
| Q6EUY9       | 285223 |
| A7S2J5       | 45351  |
| Q1HR24       | 7159   |
| Q4GXR8       | 292460 |
| A6N9P0       | 140564 |
| Q6B8A8       | 29930  |
| Q4PM10       | 6945   |
| Q9XYQ4       | 35570  |
| B5DKT4       | 46245  |
| B5DKT3       | 46245  |
| B5DRY2       | 46245  |
| B4H3V3       | 7234   |
| B4G5E9       | 7234   |
| B4H871       | 7234   |
| Q56FC4       | 77504  |
| Q8WSQ7       | 27405  |
| A9UDP3       | 478208 |
| A2I3Z5       | 177089 |
| B3NXZ6       | 7220   |

| symbol RPS14 |        |
|--------------|--------|
| B3NXZ7       | 7220   |
| P14130       | 7227   |
| B3MRI2       | 7217   |
| B3MRI3       | 7217   |
| B4NU46       | 7240   |
| B4N1W4       | 7260   |
| B4NMG4       | 7260   |
| Q7QBX2       | 7165   |
| Q7QEH1       | 7165   |
| B3S4M7       | 10228  |
| B6DDR5       | 43151  |
| B4IL57       | 7238   |
| B4IL58       | 7238   |
| Q962R5       | 7108   |
| Q4GXR9       | 197013 |
| Q6F434       | 51655  |
| Q5UAM9       | 7091   |
| Q66SW2       | 7091   |
| P48150       | 6239   |
| B4Q0P9       | 7245   |
| A9UTG2       | 81824  |
| A1BQ64       | 6279   |
| P48855       | 6728   |
| A1BQ87       | 34506  |
| Q4KTC8       | 55567  |
| Q2H733       | 38033  |
| Q56J82       | 317012 |
| Q5EN09       | 148305 |
| B2AXS3       | 5145   |
| A7E468       | 325569 |
| A6S046       | 332648 |
| Q0V1M6       | 13684  |
| Q0CXQ6       | 341663 |
| A6REL0       | 339724 |
| B6QPA0       | 441960 |
| B8M8L7       | 441959 |
| Q1DZB5       | 5501   |
| A2QD79       | 425011 |
| Q4X1C6       | 5085   |
| B0XS79       | 451804 |
| A1DGX0       | 331117 |
| A1C695       | 5057   |
| Q2U044       | 5062   |
| B8NB42       | 332952 |
| P19115       | 5141   |
| Q5B0H0       | 162425 |
| B6HR74       | 500485 |
| B2WF70       | 426418 |
| B8P8W4       | 561896 |
| Q5KFT0       | 5207   |
| B0D6C8       | 486041 |

| symbol RPS14 |        |
|--------------|--------|
| A8NNH7       | 240176 |
| A8QA30       | 425265 |
| Q6BHV6       | 4959   |
| A3LQJ1       | 4924   |
| Q96W53       | 5476   |
| B2G3U1       | 4956   |
| B2G3T1       | 4956   |
| P06367       | 4932   |
| P39516       | 4932   |
| B3LUA2       | 285006 |
| B3LPT6       | 285006 |
| A6ZTL2       | 307796 |
| A6ZQE5       | 307796 |
| P27069       | 28985  |
| A7TFH1       | 436907 |
| Q758E0       | 33169  |
| Q6CA55       | 4952   |
| Q6FKW5       | 5478   |
| Q6FNE1       | 5478   |
| O14150       | 4896   |
| B6K471       | 402676 |
| B6JY89       | 402676 |
| B2R5G5       | 9606   |
| P13471       | 10116  |
| Q4PA42       | 5270   |
| Q8SSA6       | 6035   |
| B4GQF6       | 7234   |
| B5DJ85       | 46245  |
| B5G2W0       | 59729  |
| O70569       | 10090  |
| Q3UJS5       | 10090  |
| Q6GQQ8       | 9606   |
| B3MH77       | 7217   |
| A5DSS0       | 379508 |
| A7TGT1       | 436907 |
| B4IS84       | 7234   |
| B8XVP3       | 329105 |

| symbol SALL4 |       |
|--------------|-------|
| Q9UJQ4       | 9606  |
| A5GFR9       | 9823  |
| A2AV00       | 10090 |
| Q8BX22       | 10090 |
| Q5F3B8       | 9031  |
| A4D0F7       | 9031  |
| Q6NX24       | 8364  |
| Q7T184       | 8355  |
| Q640I8       | 8355  |
| Q9PVN7       | 8355  |
| A0MWC1       | 7955  |
| Q27ZK0       | 54126 |

## CLUSTERS

| symbol EIF2B1 |        |
|---------------|--------|
| Q14232        | 9606   |
| Q5RAR0        | 9601   |
| Q4R4V8        | 9541   |
| Q0IIF2        | 9913   |
| Q99LC8        | 10090  |
| Q3UZR8        | 10090  |
| Q64270        | 10116  |
| B5XAS9        | 8030   |
| B5DG92        | 8030   |
| B5XGV9        | 8030   |
| Q4S231        | 99883  |
| A5WWE5        | 7955   |
| A5WWE4        | 7955   |
| Q6IQQ8        | 7955   |
| Q28D56        | 8364   |
| Q6NUG3        | 8355   |
| B6M402        | 7739   |
| A7SMK4        | 45351  |
| Q0ZB82        | 7091   |
| A9UQZ5        | 81824  |
| B0W6F7        | 7176   |
| B3LYV6        | 7217   |
| Q9VAD4        | 7227   |
| Q9GQ89        | 7227   |
| B3P819        | 7220   |
| B4R0W6        | 7240   |
| B4HZI5        | 7238   |
| B4PPH0        | 7245   |
| B4JSA2        | 7222   |
| B7PIZ1        | 6945   |
| Q1HQT4        | 7159   |
| Q29C92        | 46245  |
| B4GNF8        | 7234   |
| B4KC31        | 7230   |
| B4NLD5        | 7260   |
| B4MB98        | 7244   |
| A8PCE7        | 6279   |
| P34604        | 6239   |
| A5DAR0        | 4929   |
| Q6BKH5        | 4959   |
| B6K4W4        | 402676 |
| A3LWH5        | 4924   |
| Q59S48        | 5476   |
| Q6CBJ8        | 4952   |
| Q86E66        | 6182   |
| Q5DDN9        | 6182   |
| A5E767        | 379508 |
| Q9USP0        | 4896   |
| P14741        | 4932   |
| B5VMH4        | 545124 |
| B3LRB0        | 285006 |

| symbol EIF2B1 |        |
|---------------|--------|
| A6ZZZ0        | 307796 |
| Q8TFL1        | 5478   |
| A7TNT2        | 436907 |
| Q754J0        | 33169  |
| Q6CK30        | 28985  |
| A8PX87        | 425265 |
| Q0CF06        | 341663 |
| Q0U2M2        | 13684  |
| A2RAX1        | 425011 |
| Q2UE99        | 5062   |
| Q1DKM9        | 5501   |
| Q5BH13        | 162425 |
| Q4WV99        | 5085   |
| A7ESN9        | 325569 |
| Q4P9P2        | 5270   |
| B2WGX9        | 426418 |
| B6HIV9        | 500485 |
| A1DE56        | 331117 |
| A1CB87        | 5057   |
| B8NH33        | 332952 |
| B8LTE3        | 441959 |
| B6Q5K4        | 441960 |
| A8NFI4        | 240176 |
| BOY0X9        | 451804 |
| Q5KKV3        | 5207   |
| Q55VD2        | 5207   |
| A6RS37        | 332648 |
| A6QU16        | 339724 |
| Q7RX32        | 5141   |
| B2AZE1        | 5145   |
| A4QW79        | 148305 |

| symbol Ddb1 |       |
|-------------|-------|
| Q3U1J4      | 10090 |
| Q16531      | 9606  |
| P33194      | 9534  |
| A1A4K3      | 9913  |
| Q5R649      | 9601  |
| Q9ESW0      | 10116 |
| Q805F9      | 9031  |
| Q6P6Z0      | 8355  |
| B6NP50      | 7739  |
| B6MGX7      | 7739  |
| B7PIF3      | 6945  |
| Q6PGT6      | 7955  |
| A7SOJ1      | 45351 |
| Q7QC66      | 7165  |
| B0X4E5      | 7176  |
| Q17I87      | 7159  |
| Q17I86      | 7159  |
| B3P186      | 7220  |

| symbol Ddb1 |        |
|-------------|--------|
| Q9XYZ5      | 7227   |
| B4G5M0      | 7234   |
| B4PPW4      | 7245   |
| Q299R6      | 46245  |
| B3LX39      | 7217   |
| B4NG66      | 7260   |
| B4HGB4      | 7238   |
| B4R1W6      | 7240   |
| B4M6L6      | 7244   |
| B4K8H1      | 7230   |
| B4JEV4      | 7222   |
| B3RLC6      | 10228  |
| Q21554      | 6239   |
| A8PZR4      | 6279   |
| A9UM77      | 8364   |
| A9URW6      | 81824  |
| Q0UHP7      | 13684  |
| B2WGB8      | 426418 |
| Q4WM68      | 5085   |
| B0Y8E0      | 451804 |
| A1DNF2      | 331117 |
| Q2UHA6      | 5062   |
| A1CTY5      | 5057   |
| B6QNF9      | 441960 |
| B8MEU5      | 441959 |
| B8N8Z0      | 332952 |
| Q0CML9      | 341663 |
| A2QS04      | 425011 |
| Q5BFT4      | 162425 |
| B6HLE5      | 500485 |
| A6QUN8      | 339724 |
| O13807      | 4896   |
| B2B3E6      | 5145   |
| Q2H1Z3      | 38033  |
| Q7S9R0      | 5141   |
| A7ESR3      | 325569 |
| A4QTE6      | 148305 |
| A6S939      | 332648 |
| B6K4A1      | 402676 |
| B0CVD1      | 486041 |
| Q1EBM7      | 5501   |
| A8PZR5      | 6279   |
| B4DSA8      | 9606   |
| B7Z2A1      | 9606   |
| Q91YC8      | 10090  |
| B4DZP5      | 9606   |

CLUSTERS

| symbol TAF8 (TBN) |       |
|-------------------|-------|
| Q7Z7C8            | 9606  |
| A7MAZ4            | 9913  |
| Q9EQH4            | 10090 |
| Q7ZYA2            | 8355  |
| Q28J24            | 8364  |
| Q5ZMS1            | 9031  |
| Q6P0T2            | 7955  |
| B5XDG9            | 8030  |
| B6LXJ0            | 7739  |
| Q4PLY8            | 6945  |
| B7PFJ3            | 6945  |
| Q174K2            | 7159  |
| B0WBV2            | 7176  |
| B0WBV1            | 7176  |
| B4H082            | 7234  |
| Q29H69            | 46245 |
| Q9VWY6            | 7227  |
| B4Q2U6            | 7245  |
| A7RU65            | 45351 |
| B3NTA7            | 7220  |
| B4L2H9            | 7230  |
| B4JXF0            | 7222  |
| B3MXU6            | 7217  |
| B4I6N7            | 7238  |
| B4M7V9            | 7244  |
| B4NQ20            | 7260  |
| B3RLM7            | 10228 |
| A8NY35            | 6279  |
| Q8WQ97            | 6239  |
| Q7YTH5            | 6239  |

| symbol PSG2 |      |
|-------------|------|
| Q8NC17      | 9606 |
| Q96QL5      | 9606 |
| B4DTG5      | 9606 |
| B4DTI6      | 9606 |
| Q8NBY8      | 9606 |
| A8K848      | 9606 |
| A8MT77      | 9606 |
| A8MY49      | 9606 |
| B4DTI5      | 9606 |
| O75237      | 9606 |
| O75238      | 9606 |
| P31997      | 9606 |
| P40199      | 9606 |
| Q0Z7S6      | 9606 |
| Q13774      | 9606 |
| Q14002      | 9606 |
| Q53XP7      | 9606 |
| Q5UB49      | 9606 |
| Q68DM9      | 9606 |
| Q9UPK8      | 9606 |
| Q9UPK9      | 9606 |
| A6NCK4      | 9606 |
| Q13178      | 9606 |
| Q8WYY6      | 9606 |

| symbol UPF1 (RENT1) |        |
|---------------------|--------|
| B4NDR4              | 7260   |
| A8NEE6              | 240176 |
| Q4PI26              | 5270   |
| B8M268              | 441959 |
| Q6MYI2              | 5085   |
| Q8TFW3              | 5085   |
| B0XR92              | 451804 |
| A1D2B4              | 331117 |
| Q5KKH8              | 5207   |
| Q55VR1              | 5207   |
| A8QBY0              | 6279   |
| Q1DS86              | 5501   |
| Q0D0N3              | 341663 |
| B6QCK9              | 441960 |
| A1CPF6              | 5057   |
| B6H5A7              | 500485 |
| Q2UCH7              | 5062   |
| B8N676              | 332952 |
| Q5BFN4              | 162425 |
| A2QRH3              | 425011 |
| A6QTP5              | 339724 |
| A6S6M8              | 332648 |
| A4RDH7              | 148305 |
| Q9HEH1              | 5141   |
| B2WIV2              | 426418 |
| B2B731              | 5145   |
| Q0UC02              | 13684  |
| Q2GY88              | 38033  |
| B6K5B6              | 402676 |
| B3RSL3              | 10228  |
| Q09820              | 4896   |
| A7E6P6              | 325569 |
| O76512              | 6239   |
| Q5A507              | 5476   |
| B5RTZ7              | 4959   |
| A5E297              | 379508 |
| A6ZMD9              | 307796 |
| P30771              | 4932   |
| B5VPK6              | 545124 |
| B3LLX3              | 285006 |
| A7TT23              | 436907 |
| B4GY25              | 7234   |
| A5DR11              | 4929   |
| Q75DS7              | 33169  |
| Q6CW68              | 28985  |
| A8Q0S3              | 425265 |
| Q6FVZ1              | 5478   |
| Q6C803              | 4952   |
| Q4R4A7              | 9541   |
| Q8SR02              | 6035   |
| B6Q0K1              | 7739   |

| symbol PSG2 |      |
|-------------|------|
| P11465      | 9606 |
| Q9UQ72      | 9606 |
| Q8WW91      | 9606 |
| P11464      | 9606 |
| Q00887      | 9606 |
| Q00888      | 9606 |
| Q13046      | 9606 |
| Q15235      | 9606 |
| Q15238      | 9606 |
| Q16557      | 9606 |
| Q9UQ74      | 9606 |
| A5PKV3      | 9606 |
| B2R869      | 9606 |
| B3KQL2      | 9606 |
| B4DTF1      | 9606 |
| Q00889      | 9606 |
| Q15227      | 9606 |
| Q68CR6      | 9606 |
| Q6P520      | 9606 |

| symbol UPF1 (RENT1) |        |
|---------------------|--------|
| Q92900              | 9606   |
| Q9EPU0              | 10090  |
| Q6GNR2              | 8355   |
| Q7ZVZ4              | 7955   |
| Q4SBL0              | 99883  |
| Q98TR3              | 31033  |
| B7PZ74              | 6945   |
| Q16NZ5              | 7159   |
| B0WYS1              | 7176   |
| B4L1X0              | 7230   |
| B5DMP8              | 46245  |
| B3N1D5              | 7217   |
| B4Q1H2              | 7245   |
| B4JKW7              | 7222   |
| B3NT15              | 7220   |
| B4IL93              | 7238   |
| Q9VYS3              | 7227   |
| B4M8B6              | 7244   |
| B4NTS6              | 7240   |
| B0D7I8              | 486041 |



CLUSTERS

| symbol CDX2 |        |
|-------------|--------|
| Q99626      | 9606   |
| Q04649      | 10036  |
| Q9ESV7      | 10116  |
| P43241      | 10090  |
| Q543L9      | 10090  |
| Q8BQI5      | 10090  |
| P79788      | 9031   |
| Q0ZD37      | 55291  |
| B7ZUR8      | 8364   |
| Q90X89      | 8364   |
| B1H2D1      | 8364   |
| Q90X88      | 8364   |
| Q90X90      | 8364   |
| A5PLE8      | 7955   |
| Q0ZDF8      | 7924   |
| A6H8J8      | 8355   |
| Q91622      | 8355   |
| Q869A1      | 114398 |
| Q17243      | 7091   |
| Q3LRS0      | 6359   |
| Q8I757      | 6465   |
| A0MIN3      | 7425   |
| Q7Z1M7      | 168635 |
| Q9XYQ3      | 7165   |
| Q16G14      | 7159   |
| Q4H3T1      | 7719   |
| A9YU93      | 178772 |
| O96714      | 7070   |
| O96715      | 7070   |
| B4MWB4      | 7260   |
| P09085      | 7227   |
| A4V0Y1      | 7227   |
| B4G734      | 7234   |
| Q29LX3      | 46245  |
| B4KEC9      | 7230   |
| A9YU92      | 92596  |
| B3MK24      | 7217   |
| B0WCI9      | 7176   |
| B4Q3H6      | 7240   |
| B4P6K2      | 7245   |
| A9YU97      | 88686  |
| A9YU96      | 88686  |
| A9YU98      | 88686  |
| B3NKZ2      | 7220   |
| B4IFF8      | 7238   |
| B8XJD7      | 286459 |
| B4JC09      | 7222   |
| B4LST5      | 7244   |
| Q65ZB9      | 6239   |
| P34766      | 6239   |
| Q86C64      | 54126  |

| symbol CDX2 |       |
|-------------|-------|
| Q2T9K7      | 8355  |
| Q32NJ4      | 8355  |
| A6QLL3      | 9913  |
| O14627      | 9606  |
| P18111      | 10090 |
| P47902      | 9606  |
| Q07424      | 10090 |
| Q90Z54      | 9031  |
| Q91542      | 8355  |
| Q9DEB6      | 9031  |
| A2T7H5      | 9600  |
| A1A513      | 9606  |
| Q78Z64      | 10090 |
| Q32NU3      | 8355  |
| Q7T0X3      | 8355  |
| A8KBT9      | 7955  |
| Q6DG63      | 7955  |
| Q6T5L3      | 8022  |
| Q90262      | 7955  |
| Q90320      | 7962  |
| P46692      | 9031  |

| symbol NLE1 |       |
|-------------|-------|
| Q9NVX2      | 9606  |
| Q5RFF8      | 9601  |
| B2GV82      | 10116 |
| Q58D20      | 9913  |
| Q8VEJ4      | 10090 |
| B1ARD5      | 10090 |
| Q3URT5      | 10090 |
| Q3TC83      | 10090 |
| Q0D2B0      | 8364  |
| Q7ZXK9      | 8355  |
| O93531      | 8355  |
| Q503R2      | 7955  |
| Q4SFU2      | 99883 |
| A8P4L3      | 6279  |
| B4JDR5      | 7222  |
| Q9VPR4      | 7227  |
| O96995      | 7227  |
| B4LTN5      | 7244  |
| Q9TYV3      | 6239  |
| B5DI07      | 46245 |
| B4G881      | 7234  |
| B4ICZ0      | 7238  |
| B4KFG7      | 7230  |
| B3N7S2      | 7220  |
| B4P2G2      | 7245  |
| B4Q658      | 7240  |
| B3MLP8      | 7217  |
| B4N0R7      | 7260  |

| symbol NLE1 |        |
|-------------|--------|
| B0WQV8      | 7176   |
| Q17DU2      | 7159   |
| Q6CHQ3      | 4952   |
| Q5KHS6      | 5207   |
| Q6FPI9      | 5478   |
| P25382      | 4932   |
| B3LUC9      | 285006 |
| A6ZTP5      | 307796 |
| A6R0X1      | 339724 |
| Q756W4      | 33169  |
| B6HTT2      | 500485 |
| Q6CU08      | 28985  |
| A1CS96      | 5057   |
| A3LYL8      | 4924   |
| Q6BUQ3      | 4959   |
| A7TG10      | 436907 |
| Q4WKM1      | 5085   |
| B0XRG3      | 451804 |
| A1D562      | 331117 |
| A5E4A7      | 379508 |
| Q2URB3      | 5062   |
| Q0CN43      | 341663 |
| B2G4U1      | 4956   |
| O74855      | 4896   |
| A2Q912      | 425011 |
| A6SK49      | 332648 |
| B6K132      | 402676 |
| B8MB26      | 441959 |
| Q4P8F4      | 5270   |
| Q5BGG9      | 162425 |
| A8PS28      | 425265 |
| B8PB85      | 561896 |
| B8PHB8      | 561896 |
| B6QE75      | 441960 |
| Q0UX06      | 13684  |
| Q2HEX4      | 38033  |
| B2W009      | 426418 |
| A4QQ33      | 148305 |
| A7EGD9      | 325569 |
| Q7SFT7      | 5141   |
| A5DKH1      | 4929   |
| A8NAE4      | 240176 |
| B2AAZ6      | 5145   |
| B8MYK8      | 332952 |
| A9V9Z8      | 81824  |
| Q1DI90      | 5501   |
| B6MJC7      | 7739   |
| B6MJB6      | 7739   |

CLUSTERS

| symbol BMP4 |        |
|-------------|--------|
| P12644      | 9606   |
| B0CM38      | 9555   |
| A7LJT9      | 9823   |
| B3RF16      | 42254  |
| B2KI82      | 59479  |
| B5FW32      | 30611  |
| Q8MJV5      | 9378   |
| Q2KJH1      | 9913   |
| A8VTF8      | 9940   |
| A6N998      | 9925   |
| Q6AYU9      | 10116  |
| Q811S3      | 10116  |
| Q06826      | 10116  |
| P21275      | 10090  |
| Q3ULR1      | 10090  |
| O46576      | 9986   |
| Q29607      | 30532  |
| Q2L6L2      | 10047  |
| Q2VEW5      | 42716  |
| Q90752      | 9031   |
| A5HMF9      | 8839   |
| A5HMF8      | 8839   |
| Q90YD6      | 8364   |
| O73818      | 8355   |
| Q91703      | 8355   |
| Q6PAF3      | 8355   |
| B5X135      | 8030   |
| Q8JIJ5      | 8128   |
| Q8JIK2      | 40171  |
| Q8JIK1      | 194657 |
| Q8JFE2      | 32488  |
| Q78DH6      | 143505 |
| Q78DH5      | 70786  |
| Q78DH4      | 68046  |
| Q78DH3      | 27763  |
| Q8JIJ8      | 303518 |
| A4UY01      | 77306  |
| Q8JIK0      | 51791  |
| Q8JIJ9      | 8153   |
| Q8JIJ3      | 8148   |
| Q8JIJ7      | 70784  |
| Q8JIJ4      | 64557  |
| Q8JIJ6      | 50897  |
| Q8JIJ2      | 8129   |
| A0MK35      | 7994   |
| O57574      | 7955   |
| O13107      | 7955   |
| Q9U418      | 7741   |
| Q9U5E8      | 63121  |
| Q869A4      | 114398 |
| O76851      | 7729   |

| symbol BMP4 |       |
|-------------|-------|
| B0WCI2      | 7176  |
| P07713      | 7227  |
| B3NA13      | 7220  |
| P91706      | 7240  |
| B4Q848      | 7240  |
| Q1WKY6      | 7245  |
| B4NWQ1      | 7245  |
| Q1WKY8      | 7233  |
| P91720      | 7244  |
| B4LUE0      | 7244  |
| B4KGU4      | 7230  |
| B4GSL3      | 7234  |
| P91699      | 46245 |
| B3N1Z7      | 7217  |
| B4I2K9      | 7238  |
| B3S0I2      | 10228 |
| A8QEZ8      | 6279  |
| O16134      | 6279  |
| O16123      | 6280  |
| Q53XC5      | 9606  |
| A5PJI9      | 9913  |
| A7SAY4      | 45351 |
| B6NVZ7      | 7739  |
| O02424      | 6239  |
| O93369      | 7955  |
| P12643      | 9606  |
| P30884      | 8355  |
| P30885      | 8355  |
| P49001      | 10116 |
| Q17JZ3      | 7159  |
| Q26974      | 7070  |
| Q497W8      | 10090 |
| Q4H3U6      | 7719  |
| Q6XDQ0      | 9031  |
| Q90YD7      | 8364  |
| A0MK34      | 7994  |
| A0MK36      | 8090  |
| B1P8C3      | 8296  |
| B3DI86      | 7955  |
| B7ZPR8      | 8355  |
| B7ZRN7      | 8355  |
| O13108      | 7955  |
| O13109      | 7955  |
| O19006      | 30532 |
| O46564      | 9986  |
| O57573      | 7955  |
| O96504      | 7739  |
| P21274      | 10090 |
| P25703      | 8355  |
| Q3V1I4      | 10090 |
| Q498L8      | 8355  |

| symbol BMP4 |       |
|-------------|-------|
| Q58E94      | 8355  |
| Q0P6N0      | 45351 |
| Q5YJC4      | 45351 |
| O76514      | 6239  |
| B4JAU3      | 7222  |
| B4MU02      | 7260  |

| symbol Klf2 |       |
|-------------|-------|
| Q60843      | 10090 |
| B2RS60      | 10090 |
| Q3V293      | 10090 |
| Q9ET58      | 10116 |
| Q9Y5W3      | 9606  |
| B4X5Z2      | 9823  |
| Q28D19      | 8364  |
| Q8QGW5      | 8355  |
| Q90XE7      | 7955  |
| Q1LXI7      | 7955  |
| Q6P3M5      | 7955  |
| Q4RWQ1      | 99883 |
| B5X170      | 8030  |
| B5X2J1      | 8030  |
| B5X3X7      | 8030  |
| B6MI74      | 7739  |
| Q4H2J1      | 7719  |
| A7YWE2      | 9913  |
| B8XIA4      | 9544  |
| O43474      | 9606  |
| Q13351      | 9606  |
| Q28BQ7      | 8364  |
| Q28D29      | 8364  |
| Q52JJ4      | 9823  |
| Q60793      | 10090 |
| Q90XS5      | 8355  |
| Q923V7      | 10116 |
| Q9DFS2      | 7955  |
| B4YSE4      | 9823  |
| Q4R355      | 9541  |
| B4YSE2      | 9823  |
| P46099      | 10090 |
| Q0P5B6      | 9913  |
| Q1RME5      | 10090 |
| Q3TZ82      | 10090 |
| Q2TAV3      | 8355  |
| Q7SZU5      | 8355  |
| Q8QGW6      | 8355  |
| Q90XE8      | 7955  |

## CLUSTERS

| symbol SMAD1 |        |
|--------------|--------|
| P70340       | 10090  |
| Q6GT95       | 10090  |
| Q8C3Y6       | 10090  |
| P97454       | 10090  |
| Q8CC31       | 10090  |
| Q15797       | 9606   |
| A8KAJ0       | 9606   |
| Q1JQA2       | 9913   |
| Q864V7       | 9823   |
| Q6P7A6       | 10116  |
| P97588       | 10116  |
| Q9I962       | 93934  |
| Q56IA0       | 9031   |
| Q6DIS7       | 8364   |
| Q6PF32       | 8355   |
| Q5HZ76       | 8355   |
| P79947       | 8355   |
| Q91693       | 8355   |
| Q4RKM8       | 99883  |
| Q5PQZ2       | 7955   |
| Q9I8V2       | 7955   |
| Q7T082       | 7955   |
| Q179T8       | 7159   |
| Q7Q8L8       | 7165   |
| A5HNG5       | 155462 |
| B6N1T6       | 7739   |
| B4I2W3       | 7238   |
| B4NXE4       | 7245   |
| B3NAR3       | 7220   |
| B4MZB1       | 7260   |
| B4KEV0       | 7230   |
| P42003       | 7227   |
| Q4H2T7       | 7719   |
| B0W056       | 7176   |
| B4LU30       | 7244   |
| B5DJI3       | 46245  |
| B4GSG1       | 7234   |
| B3N202       | 7217   |
| B7Q8J0       | 6945   |
| O97044       | 7729   |
| B4JAN5       | 7222   |
| B4Q940       | 7240   |
| A8SLH6       | 79327  |
| A7RNC1       | 45351  |
| Q27W08       | 45351  |
| Q70TA7       | 6211   |
| Q810W4       | 10090  |
| Q5R6H7       | 9601   |
| Q99717       | 9606   |
| Q68DB7       | 9606   |
| Q6I9T1       | 9606   |

| symbol SMAD1 |       |
|--------------|-------|
| Q9R1V3       | 10116 |
| B1WBR0       | 10116 |
| Q56I99       | 9031  |
| Q9W7E7       | 7955  |
| A5PMC0       | 7955  |
| Q7ZU01       | 7955  |
| B5X4J3       | 8030  |
| B5LVZ1       | 10224 |
| Q8T6S2       | 6087  |
| B3RY25       | 10228 |
| Q9GQN9       | 6183  |
| Q5DBJ6       | 6182  |
| A8Q2C6       | 6279  |
| A8Q7L1       | 6279  |
| O15198       | 9606  |
| O54835       | 10116 |
| Q56I98       | 9031  |
| Q6DIZ6       | 8364  |
| Q6PF37       | 8355  |
| Q9JIW5       | 10090 |
| A2PZA6       | 7668  |
| A7S9L0       | 45351 |
| A8K4B6       | 9606  |
| B0WCK9       | 7176  |
| B1B1A2       | 10090 |
| B2XS64       | 50426 |
| B3NWK5       | 7220  |
| B6LVE9       | 7739  |
| B6MYD0       | 7739  |
| B7Z4Z5       | 9606  |
| B7Z5N5       | 9606  |
| O70436       | 10116 |
| P84022       | 9606  |
| P84023       | 9031  |
| P84024       | 9823  |
| P84025       | 10116 |
| Q06BS0       | 7959  |
| Q06BS1       | 7959  |
| Q07G47       | 8364  |
| Q08DE0       | 9913  |
| Q15796       | 9606  |
| Q1W668       | 9913  |
| Q2A658       | 6211  |
| Q32N71       | 8355  |
| Q4H2T5       | 7719  |
| Q4H2T6       | 7719  |
| Q53XR6       | 9606  |
| Q5R7C0       | 9601  |
| Q5U4Q3       | 8364  |
| Q62432       | 10090 |
| Q66HX9       | 7955  |

| symbol SMAD1 |       |
|--------------|-------|
| Q68EP5       | 8364  |
| Q6IRR4       | 8355  |
| Q6QAN7       | 7957  |
| Q6QAN8       | 7957  |
| Q7ZU35       | 7955  |
| Q8AY15       | 7955  |
| Q8AY16       | 7955  |
| Q8BUN5       | 10090 |
| Q8T8C9       | 7729  |
| Q8UWF3       | 9031  |
| Q90YE5       | 8355  |
| Q91912       | 8355  |
| Q9I9P9       | 7955  |
| B0WBS4       | 7176  |
| B3RI80       | 10228 |
| Q02330       | 6239  |
| A2A2Y6       | 9606  |
| Q0VER3       | 10090 |
| Q3UVC6       | 10090 |
| Q1LZG1       | 9913  |
| Q4T7H2       | 99883 |
| Q5TBA1       | 9606  |
| Q5XJE0       | 7955  |
| Q6A3P7       | 7955  |
| Q8QGG4       | 8355  |
| Q8QGG5       | 8355  |
| Q8QGG6       | 8355  |
| Q91913       | 8355  |
| Q98TU1       | 8355  |
| Q06AL5       | 9913  |

CLUSTERS

| symbol Cer1 |       |
|-------------|-------|
| O55233      | 10090 |
| B0BN87      | 10116 |
| Q3SY34      | 9606  |
| O95813      | 9606  |
| Q9PWBO      | 9031  |
| Q9PUK2      | 9031  |
| P70041      | 8355  |
| Q07G34      | 8364  |
| B7ZTZ7      | 8364  |
| A8E7M9      | 7955  |
| Q76C29      | 7955  |
| Q76C27      | 8255  |
| Q76C28      | 31033 |
| A2ADM9      | 10090 |

| symbol Cga |        |
|------------|--------|
| P01216     | 10090  |
| Q3MU80     | 10032  |
| Q2L4U1     | 10029  |
| Q2HWE5     | 10044  |
| Q9ERG5     | 10036  |
| Q9ERG4     | 35658  |
| Q9ERJ6     | 10047  |
| P11962     | 10116  |
| Q6P509     | 10116  |
| P68268     | 9337   |
| Q6YNX4     | 13616  |
| P68267     | 9321   |
| Q9BDI8     | 74533  |
| P01219     | 9823   |
| Q8HZS0     | 9649   |
| P07474     | 9986   |
| Q52R91     | 9685   |
| Q9XSW8     | 9615   |
| Q9ERG3     | 79202  |
| Q8WN20     | 9646   |
| P01217     | 9913   |
| Q19PY8     | 30521  |
| Q8WMR3     | 9863   |
| P01218     | 9940   |
| Q9GL36     | 89462  |
| Q8WMW8     | 9925   |
| B5TXE0     | 9860   |
| P51499     | 9483   |
| Q3YC03     | 39432  |
| Q28365     | 9793   |
| Q8JJB6     | 260615 |
| O46642     | 9790   |
| Q9BEH3     | 9541   |
| P22762     | 9544   |
| Q3HRV5     | 37293  |

| symbol Cga |        |
|------------|--------|
| Q1EPR1     | 10160  |
| P01220     | 9796   |
| P68241     | 9103   |
| P68242     | 93934  |
| B2YI99     | 8845   |
| Q9JK68     | 10141  |
| Q8JIE9     | 128390 |
| Q8JJB7     | 8508   |
| Q9DGA6     | 7892   |
| P37036     | 9767   |
| P25329     | 9755   |
| P01215     | 9606   |
| Q6I9S8     | 9606   |
| Q96QJ4     | 9606   |
| Q6INB1     | 8355   |
| P80665     | 8801   |
| Q90YF0     | 7830   |
| B2ZFP8     | 61970  |
| B2ZFP7     | 61970  |
| Q8JJB5     | 118850 |
| Q5YFR9     | 7902   |
| P37037     | 13095  |
| A7XUG4     | 7965   |
| P30983     | 7959   |
| A7XUG2     | 7959   |
| B8Y6D6     | 7939   |
| P27794     | 7936   |
| Q9YGP3     | 7998   |
| Q75NP8     | 7937   |
| Q75N55     | 8402   |
| P18857     | 7962   |
| P01221     | 7962   |
| Q90WD7     | 27689  |
| Q5IAT0     | 211491 |
| Q5IAS9     | 211491 |
| Q5I9C7     | 211491 |
| Q5IAT1     | 211491 |
| Q5D1X7     | 211488 |
| Q5D1X6     | 211488 |
| Q5D1X8     | 211488 |
| Q5D1X9     | 211488 |
| P53542     | 13013  |
| Q5RT66     | 7957   |
| Q5RT67     | 7957   |
| Q14DX5     | 175797 |
| Q6QX43     | 7955   |
| B9EMI1     | 8030   |
| Q6TM06     | 8030   |
| Q91370     | 8020   |
| Q91371     | 8020   |
| P80051     | 8400   |

| symbol Cga |        |
|------------|--------|
| P12836     | 7946   |
| Q9OZY3     | 13489  |
| Q9DG94     | 8022   |
| P69062     | 74940  |
| P69063     | 8018   |
| Q6X4V6     | 188791 |
| A6BMG6     | 42892  |
| B5LSW8     | 229072 |
| Q91119     | 34816  |
| Q7SYG7     | 232417 |
| Q9DEH2     | 143350 |
| P30970     | 8177   |
| Q71SH0     | 8175   |
| A5Z1E4     | 72011  |
| A7UDN7     | 8090   |
| Q8AXA3     | 43700  |
| Q8AXA4     | 205852 |
| Q90W29     | 8255   |
| Q8AUU2     | 94232  |
| A5JVA3     | 323802 |
| P37204     | 8241   |
| Q7T2Y4     | 8128   |
| A8J4H5     | 98377  |
| Q56TL7     | 214486 |
| Q801A1     | 215347 |
| Q2EGA1     | 219752 |
| Q4TUC5     | 103715 |
| P47744     | 8078   |
| B2KS58     | 28829  |
| Q90W18     | 8267   |
| B0VXR7     | 8049   |
| A1ILL6     | 146921 |
| A2AVN3     | 10090  |

| symbol AFP |       |
|------------|-------|
| P02771     | 9606  |
| P28050     | 9595  |
| Q28789     | 9598  |
| Q8MJU5     | 9615  |
| Q8MJ76     | 9823  |
| P49066     | 9796  |
| Q7TSF3     | 9995  |
| Q3SZ57     | 9913  |
| P02772     | 10090 |
| Q8BK56     | 10090 |
| Q8BK65     | 10090 |
| P02773     | 10116 |
| Q4QR90     | 10116 |
| B4DMX4     | 9606  |
| B4DMW9     | 9606  |

CLUSTERS

| symbol ATP6AP2 |       |
|----------------|-------|
| O75787         | 9606  |
| Q5R563         | 9601  |
| Q4R500         | 9541  |
| P81134         | 9913  |
| Q1XID4         | 10090 |
| Q9CYN9         | 10090 |
| A2BDN5         | 10090 |
| Q6AXS4         | 10116 |
| Q1XIH7         | 9031  |
| Q5ZMF2         | 9031  |
| B5X2F3         | 8030  |
| Q5M8F1         | 8364  |
| Q6PBY2         | 7955  |
| Q7T0S3         | 8355  |
| Q4V855         | 8355  |
| Q4RWA5         | 99883 |
| B6M7F9         | 7739  |
| B6NBN0         | 7739  |
| Q29CF3         | 46245 |
| B4GN51         | 7234  |
| B3M1L3         | 7217  |
| B3M161         | 7217  |
| Q9VHG4         | 7227  |
| B4HKG4         | 7238  |
| B4PUL1         | 7245  |
| B4K620         | 7230  |
| B4KU35         | 7230  |
| A7SQ62         | 45351 |

| symbol Pou5f1 (OCT4) |       |
|----------------------|-------|
| P20263               | 10090 |
| Q6MG27               | 10116 |
| A0MPW0               | 30630 |
| Q5TM49               | 9544  |
| B8XIA3               | 9544  |
| Q0KKP8               | 9541  |
| Q01860               | 9606  |
| Q06416               | 9606  |
| Q9TSV5               | 9823  |
| Q7YR49               | 9598  |
| A2ICN2               | 9986  |
| O97552               | 9913  |
| A7X5W5               | 9258  |
| Q5J1Q2               | 8296  |
| B7ZQA9               | 8355  |
| Q03917               | 8355  |
| Q6DVF4               | 8090  |
| B3DM50               | 8364  |
| B3DM25               | 8364  |
| B3DM23               | 8364  |

| symbol GJB3 |       |
|-------------|-------|
| O75712      | 9606  |
| Q58D78      | 9913  |
| P25305      | 10116 |
| P28231      | 10090 |
| A2A8M5      | 10090 |
| Q6PYT9      | 10036 |
| Q6GQC4      | 8355  |
| Q8QFX8      | 8355  |
| A8WGZ8      | 8364  |
| Q567J2      | 7955  |
| Q8AWR5      | 7955  |
| B3DIR8      | 7955  |
| B2R790      | 9606  |
| A1YRJ5      | 9606  |
| A2A8M6      | 10090 |
| B3KQ82      | 9606  |
| O95377      | 9606  |
| P28232      | 10116 |
| P36380      | 10116 |
| Q02738      | 10090 |
| Q02739      | 10090 |
| Q0H791      | 8355  |
| Q4RNY0      | 99883 |
| Q542M8      | 10090 |
| Q6PEY0      | 9606  |
| Q7SXS1      | 8355  |
| Q8C677      | 10090 |
| Q8QGJ5      | 31033 |
| Q91XA4      | 10090 |
| Q9NTQ9      | 9606  |

| symbol THY1 |       |
|-------------|-------|
| P04216      | 9606  |
| Q5R508      | 9601  |
| O62643      | 9544  |
| Q9WUR5      | 10141 |
| Q3SX33      | 9913  |
| P01830      | 10116 |
| P01831      | 10090 |
| Q53YX2      | 10090 |
| Q7T252      | 9031  |
| Q07212      | 9031  |
| B5G3M1      | 59729 |
| B0YJA4      | 9606  |
| Q8AV81      | 7955  |
| A2BFD8      | 7955  |
| A7MCJ5      | 7955  |
| A9UME7      | 8364  |
| Q3B751      | 7955  |

| symbol Wnt6 |       |
|-------------|-------|
| P22727      | 10090 |
| Q80ZM9      | 10090 |
| Q9Y6F9      | 9606  |
| Q8N2E5      | 9606  |
| Q3C2H6      | 9031  |
| B0FK91      | 8355  |
| B0FK92      | 8355  |
| Q4RNC9      | 99883 |
| B6L7E8      | 7739  |
| B0WGM5      | 7176  |
| B4G844      | 7234  |
| Q29N83      | 46245 |
| B4JQN3      | 7222  |
| Q9VM26      | 7227  |
| B3MK98      | 7217  |
| B4KKC9      | 7230  |
| B4LS42      | 7244  |
| B4MZW3      | 7260  |
| B4NZL8      | 7245  |
| B3N6B6      | 7220  |

| symbol Gjc1 |       |
|-------------|-------|
| P28229      | 10090 |
| Q6R4A8      | 10029 |
| Q6PYT3      | 10036 |
| A4GG66      | 10116 |
| P36383      | 9606  |
| B3KW68      | 9606  |
| A4GVD1      | 9823  |
| P28228      | 9615  |
| Q2HJ66      | 9913  |
| P18861      | 9031  |
| Q66HV7      | 7955  |
| Q0V9Q2      | 8364  |
| Q7ZXS7      | 8355  |
| Q8QFX7      | 8355  |
| Q1HG92      | 61084 |
| Q1HG91      | 61084 |
| A2AUA9      | 10090 |
| Q6NZH5      | 8364  |
| B0UYC0      | 7955  |
| Q803S5      | 7955  |
| Q92052      | 7955  |

| symbol C7orf36 (GK003) |       |
|------------------------|-------|
| Q9NRH1                 | 9606  |
| Q6TXH1                 | 10116 |

## CLUSTERS

| symbol FGF4 |       |
|-------------|-------|
| P08620      | 9606  |
| P48803      | 9913  |
| Q542N0      | 10090 |
| P11403      | 10090 |
| Q8R5L6      | 10116 |
| B7U3X7      | 8364  |
| P48806      | 8355  |
| P48805      | 8355  |
| P48804      | 9031  |
| Q9YH31      | 8316  |
| Q9DFC9      | 7955  |
| A6H6W8      | 9913  |
| A7SG69      | 45351 |
| A7SI24      | 45351 |
| A8P371      | 6279  |
| A8Q0I7      | 6279  |
| B6KY19      | 7739  |
| B6M7K3      | 7739  |
| O15520      | 9606  |
| O35565      | 10090 |
| O35622      | 10090 |
| O42407      | 9031  |
| O43320      | 9606  |
| O54769      | 10116 |
| O60258      | 9606  |
| O76093      | 9606  |
| O88182      | 10116 |
| O89101      | 10090 |
| O95750      | 9606  |
| P03968      | 9913  |
| P03969      | 9913  |
| P05230      | 9606  |
| P09038      | 9606  |
| P10767      | 9606  |
| P11487      | 9606  |
| P12034      | 9606  |
| P12226      | 8355  |
| P13109      | 10116 |
| P15655      | 10090 |
| P15656      | 10090 |
| P19596      | 9031  |
| P21658      | 10090 |
| P21781      | 9606  |
| P31371      | 9606  |
| P36363      | 10090 |
| P36364      | 10116 |
| P37237      | 10090 |
| P48798      | 13616 |
| P48800      | 9031  |
| P48801      | 9031  |
| P48802      | 7955  |

| symbol FGF4 |       |
|-------------|-------|
| P48807      | 10116 |
| P54130      | 10090 |
| P55075      | 9606  |
| P61148      | 10090 |
| P61149      | 10116 |
| P61150      | 10116 |
| P61328      | 9606  |
| P61329      | 10090 |
| P63075      | 10090 |
| P63076      | 10116 |
| P70378      | 10090 |
| P70379      | 10090 |
| P70492      | 10116 |
| P79150      | 9615  |
| Q02195      | 10116 |
| Q0VG15      | 10090 |
| Q11184      | 6239  |
| Q197G3      | 9031  |
| Q20FD0      | 9615  |
| Q28DZ3      | 8364  |
| Q2LGG1      | 7955  |
| Q5KRA4      | 9031  |
| Q5M7N7      | 8364  |
| Q5PRC3      | 7955  |
| Q5TKR1      | 7955  |
| Q641J3      | 8364  |
| Q66IF7      | 8364  |
| Q6DFL4      | 8355  |
| Q6GLR6      | 8355  |
| Q6GLX1      | 8355  |
| Q6NZS6      | 7955  |
| Q6SJP8      | 7955  |
| Q76LI5      | 10116 |
| Q7ZZN4      | 9031  |
| Q8AY90      | 7955  |
| Q8I6J3      | 7719  |
| Q8I6J6      | 7719  |
| Q8R5L5      | 10116 |
| Q8R5L7      | 10116 |
| Q8R5L8      | 10116 |
| Q8R5L9      | 10116 |
| Q8VCY9      | 10090 |
| Q8VI79      | 10116 |
| Q8VI80      | 10116 |
| Q8VI81      | 10116 |
| Q8VI82      | 10116 |
| Q90722      | 9031  |
| Q92913      | 9606  |
| Q92914      | 9606  |
| Q92915      | 9606  |
| Q95L12      | 9823  |

| symbol FGF4 |       |
|-------------|-------|
| Q9DDN0      | 9031  |
| Q9EPC2      | 10090 |
| Q9ERW3      | 10116 |
| Q9ESL8      | 10090 |
| Q9ESL9      | 10090 |
| Q9ESS2      | 10090 |
| Q9EST9      | 10116 |
| Q9GZV9      | 9606  |
| Q9HCT0      | 9606  |
| Q9I950      | 9031  |
| Q9IAI3      | 9031  |
| Q9IAI5      | 9031  |
| Q9JIN1      | 10090 |
| Q9NP95      | 9606  |
| Q9NSA1      | 9606  |
| Q9W6A1      | 9031  |
| A0AUQ1      | 7955  |
| A6P7H5      | 8355  |
| A6P7H6      | 8355  |
| A6QPP3      | 9913  |
| A8K1P5      | 9606  |
| B1AK18      | 9606  |
| B2R976      | 9606  |
| B3DHz8      | 7955  |
| B7U3Y0      | 8364  |
| B7U3Y1      | 8364  |
| B7Z4M7      | 9606  |
| B7Z8N0      | 9606  |
| B8Y4H7      | 8364  |
| B8Y4H8      | 8364  |
| B8Y4H9      | 8364  |
| O89096      | 10090 |
| P70377      | 10090 |
| Q0IHY3      | 8364  |
| Q3UR31      | 10090 |
| Q4RP64      | 99883 |
| Q4RVA8      | 99883 |
| Q5R5C0      | 9601  |
| Q5RDS9      | 9601  |
| Q5TKR2      | 7955  |
| Q5TKR3      | 7955  |
| Q5TKR4      | 7955  |
| Q5U3Q2      | 7955  |
| Q794I6      | 10116 |
| Q9W6A2      | 9031  |
| B5LX82      | 8355  |
| B7ZSQ9      | 8364  |
| Q07G49      | 8364  |
| Q5R2I6      | 13735 |
| Q6RX23      | 9863  |
| Q8QG59      | 8296  |

CLUSTERS

| symbol FGF4 |       |
|-------------|-------|
| Q95K97      | 9541  |
| Q9N1B9      | 9940  |
| Q790L8      | 10090 |
| A2RTU5      | 10090 |
| B7ZLG4      | 9606  |
| B7ZMS7      | 10090 |
| Q0VF19      | 10090 |
| Q8C471      | 10090 |
| Q0VCA0      | 9913  |
| Q5SQB2      | 10090 |
| Q5TKR7      | 7955  |
| Q5TKR8      | 7955  |
| A8K147      | 9606  |
| B0CM87      | 9555  |
| B0KW92      | 9483  |
| B1MTE5      | 9523  |
| B2KI41      | 59479 |
| B2R5T0      | 9606  |
| B3DGE3      | 7955  |
| B3EX47      | 42254 |
| B4USY8      | 30611 |
| B7NZB1      | 9986  |
| B7U3X6      | 8364  |
| P34004      | 10036 |
| Q5NVQ3      | 9601  |
| Q6ZWS1      | 10090 |
| Q7M303      | 9940  |
| A4LBB8      | 9606  |
| P20003      | 9940  |
| P78443      | 9606  |
| Q4JH23      | 9940  |
| Q541T2      | 10090 |
| Q8QFR9      | 31033 |
| B7U3X8      | 8364  |
| Q5MFAQ8     | 13489 |
| Q5TLE1      | 7955  |
| Q8AXA1      | 7955  |
| Q9YGD8      | 8022  |
| B3DHR1      | 7955  |
| B5X6L5      | 8030  |
| B7ZPF9      | 8355  |
| P05524      | 10090 |
| P36386      | 8355  |
| Q3KQ53      | 8355  |
| A0MTF4      | 9913  |
| A2AXN8      | 9685  |
| Q8NF90      | 9606  |
| A6Y7S4      | 42716 |
| B7ZPK6      | 8355  |
| Q5FXK5      | 8022  |
| Q90Y92      | 8330  |

| symbol FGF4 |       |
|-------------|-------|
| Q925A3      | 10090 |
| B2MVW3      | 9940  |
| P48808      | 9940  |
| Q4KL95      | 8355  |
| Q544I6      | 10090 |
| Q5D0X0      | 9860  |
| Q5RAY8      | 9601  |
| Q8C386      | 10090 |
| Q9N198      | 9823  |
| A8K427      | 9606  |
| A9CSE5      | 8410  |
| B2RPH5      | 9606  |
| B7UCP9      | 8364  |
| B7ZQK4      | 8355  |
| Q059W0      | 10090 |
| Q0KJ02      | 8090  |
| Q0KJ03      | 8090  |
| Q2HXK8      | 7955  |
| Q2LJ24      | 7955  |
| Q38PL0      | 7955  |
| Q3ZF15      | 42716 |
| Q49919      | 10090 |
| Q91875      | 8355  |
| Q9PVY1      | 8355  |
| B3DJ36      | 7955  |
| B6EBS1      | 7959  |
| B7TIR5      | 38577 |
| Q42278      | 7955  |
| O57341      | 7955  |
| Q0PJT5      | 7994  |
| Q3V279      | 10090 |
| Q4R0X9      | 9031  |
| Q805B2      | 7955  |
| Q80ZL6      | 10090 |
| Q8AXC5      | 8355  |
| Q8MJV6      | 9378  |
| Q9DE51      | 8296  |
| A1A514      | 9606  |
| A1A515      | 9606  |
| A2CF52      | 7955  |
| B8Q2W1      | 42716 |
| Q0E9Y8      | 7955  |
| A4IIV2      | 8364  |
| B1AU20      | 10090 |
| B5X194      | 8030  |
| Q0P4D2      | 7955  |
| Q5E9M0      | 9913  |
| Q5F291      | 10090 |
| Q5R8V8      | 9601  |
| Q9IAI7      | 9031  |
| B7Z1C3      | 9606  |

| symbol FGF4 |       |
|-------------|-------|
| Q3KNZ6      | 10090 |
| Q1XG75      | 7955  |
| Q4VBV7      | 7955  |
| Q8I6J1      | 51511 |
| B2RPH4      | 9606  |
| O60371      | 9606  |
| Q8N683      | 9606  |
| Q0VBJ8      | 10090 |
| Q3U1V5      | 10090 |

| symbol STAT3 |        |
|--------------|--------|
| P40763       | 9606   |
| P42227       | 10090  |
| A2A5D1       | 10090  |
| P52631       | 10116  |
| Q19S50       | 9823   |
| P61635       | 9913   |
| Q5R5Q7       | 9601   |
| Q6DV79       | 9031   |
| Q9PVX8       | 8355   |
| Q6NV46       | 7955   |
| O93599       | 7955   |
| Q6DVF3       | 8090   |
| Q6GUE7       | 8090   |
| Q90Y16       | 47145  |
| O13133       | 8022   |
| Q7ZXK3       | 8355   |
| A0T2M6       | 215402 |
| A8K7B8       | 9606   |
| B2BF21       | 8255   |
| B4DNPO       | 9606   |
| B4DVR6       | 9606   |
| B5BTZ6       | 9606   |
| B7ZA24       | 9606   |
| B7ZC17       | 10090  |
| B7ZC18       | 10090  |
| Q08D02       | 8364   |
| Q32LP6       | 9913   |
| Q3U5Q4       | 10090  |
| Q3U6S9       | 10090  |
| Q3ULI4       | 10090  |
| Q5RF79       | 9601   |
| Q6GU23       | 10090  |
| Q8JGN0       | 8355   |

## CLUSTERS

| symbol SOX2 |        |
|-------------|--------|
| P48431      | 9606   |
| P48430      | 9031   |
| B8XIA2      | 9544   |
| P54231      | 9940   |
| A2VDX8      | 9913   |
| B1PXF9      | 9823   |
| B1Q0D1      | 9823   |
| Q60I23      | 10090  |
| P48432      | 10090  |
| Q6NVN0      | 8364   |
| B6VA41      | 9796   |
| O42569      | 8355   |
| Q6DFL8      | 8355   |
| B5X176      | 8030   |
| Q6P0E1      | 7955   |
| Q6WNU1      | 31033  |
| Q4T665      | 99883  |
| B5LSX2      | 229072 |
| Q9PT76      | 8090   |
| A2I8A8      | 7957   |
| Q38KZ5      | 94232  |
| Q06B63      | 8187   |
| A5Z1E1      | 72011  |
| Q0Q579      | 7739   |
| Q7YTD4      | 10224  |
| Q9Y0D7      | 7668   |
| Q6QNM5      | 7635   |
| Q6QNM6      | 7634   |
| Q1HTN3      | 62006  |
| Q3S381      | 45351  |
| Q86SB8      | 7729   |
| B7QK34      | 6945   |
| B4ZYS7      | 45264  |
| Q21305      | 6239   |
| Q8IG08      | 6239   |
| A8PJJ8      | 6279   |
| B4QJY1      | 7240   |
| B4QJY2      | 7240   |
| Q17NV3      | 7159   |
| B0WKD7      | 7176   |
| B4PI04      | 7245   |
| B4HHC5      | 7238   |
| B3ND15      | 7220   |
| A2AM37      | 10090  |
| B7SZV3      | 10116  |
| O00570      | 9606   |
| O57401      | 9031   |
| O95416      | 9606   |
| P41225      | 9606   |
| Q0Q578      | 7739   |
| Q17MW0      | 7159   |

| symbol SOX2 |       |
|-------------|-------|
| Q2Z1R2      | 7955  |
| Q4H2S2      | 7719  |
| Q4H2S3      | 7719  |
| Q68FA4      | 8364  |
| Q6DGL6      | 7955  |
| Q6EJB7      | 7955  |
| Q6RVD7      | 7955  |
| Q80XF2      | 10090 |
| Q9PSV6      | 9031  |
| Q9W7R6      | 9031  |
| Q9Y0D8      | 7668  |
| Q9Y651      | 9606  |
| A7VKI3      | 8410  |
| A9JSZ3      | 7955  |
| B2R6J0      | 9606  |
| P48433      | 9031  |
| P53784      | 10090 |
| P55863      | 8355  |
| Q4RP71      | 99883 |
| Q5FWM3      | 8355  |
| Q6WNU0      | 31033 |
| Q80XF1      | 10090 |
| A4GU08      | 8128  |
| A4GU09      | 47969 |
| A4QNG3      | 8364  |
| B0ZTE2      | 8355  |
| B2RAC0      | 9606  |
| B5M209      | 10224 |
| B6DXB2      | 7741  |
| B7SZV1      | 9925  |
| B7SZV2      | 9913  |
| P61259      | 9541  |
| Q04892      | 10090 |
| Q32PP9      | 7955  |
| Q3UUP3      | 10090 |
| Q4SV91      | 99883 |
| Q6WNT7      | 31033 |
| Q6WNT8      | 31033 |
| Q7SZS1      | 7955  |
| Q804S0      | 7955  |
| Q9PVF6      | 7955  |
| Q9YH21      | 7955  |
| P53783      | 10090 |
| A2TED2      | 8355  |
| A2TED3      | 8364  |
| B0UY96      | 7955  |
| Q2PG84      | 8355  |
| Q6WNU3      | 31033 |
| A8WFX7      | 7955  |
| Q6I753      | 8330  |
| Q6WNU2      | 31033 |

| symbol SOX2 |       |
|-------------|-------|
| B0ZTE1      | 8355  |
| B9EJU0      | 10090 |
| Q5TBS1      | 9606  |
| Q6WNT6      | 31033 |
| Q811W0      | 10090 |
| Q9W7R5      | 9031  |
| B5G687      | 7668  |
| B5G688      | 7668  |
| B5G689      | 7668  |
| B5G693      | 7668  |
| B5G695      | 7668  |
| B5G696      | 7668  |
| B5G699      | 7668  |
| B5G6A0      | 7668  |
| B5G6A4      | 7668  |
| B5G6A6      | 7668  |
| B5G6A7      | 7671  |
| B5G6A8      | 7671  |
| B5G6B0      | 7671  |
| B5G6B3      | 7671  |
| B5G6B9      | 7671  |
| B5G6C0      | 7671  |
| B5G6C1      | 7671  |
| B5G6C2      | 7671  |
| B5G6C4      | 7671  |
| B5G6C5      | 7671  |
| B5G6C6      | 7670  |
| B5G6C7      | 7670  |
| B5G6C8      | 7670  |
| B5G6C9      | 7670  |
| B5G6D2      | 7670  |
| B5G6D7      | 7670  |
| B5G6E0      | 7670  |
| B5G6E3      | 7670  |
| B5G6E5      | 7670  |
| B5G6E6      | 7665  |
| B5G6E7      | 7665  |
| B5G6E9      | 7665  |
| B5G6F1      | 7665  |
| B5G6F2      | 7665  |
| Q6QNM7      | 7635  |
| Q6QNM8      | 7634  |



CLUSTERS

| symbol Ctnnb1 |       |
|---------------|-------|
| Q02248        | 10090 |
| Q76LW0        | 10047 |
| P35222        | 9606  |
| A8K1L7        | 9606  |
| B5BU28        | 9606  |
| Q5R5L8        | 9601  |
| Q0VCX4        | 9913  |
| Q8WNW4        | 9823  |
| B6V8E6        | 9615  |
| B1MV73        | 9796  |
| Q9WU82        | 10116 |
| Q5R2I4        | 13735 |
| B5U453        | 8839  |
| O42486        | 9031  |
| B3F375        | 8843  |
| Q4R3D3        | 9541  |
| Q63ZT4        | 8355  |
| P26233        | 8355  |
| Q7ZX35        | 8355  |
| A1A5I6        | 8355  |
| Q28GC2        | 8364  |
| B5U307        | 7957  |
| Q7T192        | 7957  |
| Q7ZU14        | 7955  |
| Q90424        | 7955  |
| B6MTY7        | 7739  |
| Q4U478        | 7739  |
| Q75WV7        | 7741  |
| B5THL1        | 10224 |
| A5YRN6        | 6359  |
| A1L024        | 6500  |
| P35224        | 6431  |
| P35223        | 7673  |
| B4N1V6        | 7260  |
| Q29I35        | 46245 |
| B4M333        | 7244  |
| B4JWY3        | 7222  |
| P18824        | 7227  |
| B3P8S9        | 7220  |
| B3MXH2        | 7217  |
| Q02453        | 7370  |
| Q76CZ7        | 6999  |
| B4Q1K8        | 7245  |
| Q17GS9        | 7159  |
| Q9NL44        | 7719  |
| Q4H3U7        | 7719  |
| O76152        | 51511 |
| Q7QHW5        | 7165  |
| B0WHS4        | 7176  |
| A4UAH1        | 6096  |
| B4L5M8        | 7230  |

| symbol Ctnnb1 |        |
|---------------|--------|
| B4I9K6        | 7238   |
| A8Q356        | 6279   |
| Q589S3        | 6161   |
| B2BLN1        | 54126  |
| Q3UZT7        | 10090  |
| Q8WRT5        | 34590  |
| A9YWT3        | 6221   |
| Q75WU5        | 114398 |
| O61229        | 7654   |
| B7SFY0        | 317513 |
| Q6LCQ8        | 6087   |
| Q25100        | 6085   |
| O44326        | 6239   |
| Q10953        | 6239   |
| Q18825        | 6239   |
| B4DGU4        | 9606   |
| B5X1P2        | 8030   |
| B5X4L1        | 8030   |
| Q8JID2        | 7955   |
| A2A4H7        | 10090  |
| B4DL06        | 9606   |
| B4DSW9        | 9606   |
| P14923        | 9606   |
| P70565        | 10116  |
| Q02257        | 10090  |
| Q6P0K8        | 10116  |
| Q8SPJ1        | 9913   |
| Q8WNW3        | 9823   |
| Q9PVF7        | 7955   |
| A8X811        | 6238   |

| symbol TEAD4 |        |
|--------------|--------|
| Q15561       | 9606   |
| B7SFP7       | 9823   |
| Q62296       | 10090  |
| P48984       | 9031   |
| B4IKD9       | 7238   |
| Q058U0       | 7227   |
| P30052       | 7227   |
| A8JUY9       | 7227   |
| Q8IR25       | 7227   |
| Q8SZ20       | 7227   |
| B4M2R1       | 7244   |
| B4L4E3       | 7230   |
| B4PX75       | 7245   |
| B4JJP7       | 7222   |
| A8PE41       | 6279   |
| B3M5D2       | 7217   |
| B6VBH7       | 135651 |
| A7MBZ7       | 7955   |
| A7SHJ8       | 45351  |

| symbol TEAD4 |       |
|--------------|-------|
| A8CSN2       | 8355  |
| A8JUY5       | 7227  |
| A9V2G2       | 81824 |
| B3RSV7       | 10228 |
| B7SFP5       | 9823  |
| P28347       | 9606  |
| P30051       | 10090 |
| Q29CR3       | 46245 |
| Q2VI02       | 9823  |
| Q4H2U7       | 7719  |
| Q641H5       | 8355  |
| Q7SXX3       | 7955  |
| Q99594       | 9606  |
| A3KN29       | 9913  |
| A9JSZ6       | 7955  |
| B4DTJ6       | 9606  |
| P70210       | 10090 |
| Q4V953       | 7955  |
| Q71U35       | 9606  |
| Q90701       | 9031  |
| Q9Z0P8       | 10090 |
| Q6MZR9       | 9606  |
| B7SFP6       | 9823  |
| Q05B82       | 9913  |
| Q3UFP5       | 10090 |
| Q3USK5       | 10090 |
| Q6PAQ8       | 10090 |
| Q80UL2       | 10090 |
| Q8NA25       | 9606  |
| B3NXJ4       | 7220  |
| A2BDD5       | 10090 |
| B5DF69       | 10116 |
| B7SFP8       | 9823  |
| P48301       | 10090 |
| Q15562       | 9606  |
| Q3UMJ5       | 10090 |
| Q3UPV9       | 10090 |
| Q3V262       | 10090 |
| Q4SIA4       | 99883 |
| B4HC05       | 7234  |

CLUSTERS

| symbol Nanog |        |
|--------------|--------|
| Q5TM83       | 57486  |
| Q80Z64       | 10090  |
| A2RS90       | 10090  |
| Q0QJG1       | 10096  |
| Q0QJG0       | 10091  |
| A8QWW8       | 10116  |
| B5B3P3       | 30630  |
| B5B3P4       | 30630  |
| Q9H9S0       | 9606   |
| A8K4D1       | 9606   |
| Q6NSW7       | 9606   |
| Q8N7R0       | 9606   |
| Q3LTE0       | 9598   |
| A2T763       | 9598   |
| Q5ICG3       | 9925   |
| Q5TM84       | 9541   |
| Q95KD6       | 9541   |
| Q4JM65       | 9913   |
| Q1W1Y4       | 9823   |
| A1YG92       | 9597   |
| A7Y7W3       | 9031   |
| A8Q4B2       | 6279   |
| A8PZL2       | 6279   |
| Q4H342       | 7719   |
| O96738       | 7719   |
| Q4H2N7       | 7719   |
| Q5J2F2       | 9615   |
| P43698       | 9615   |
| Q5EVM6       | 34765  |
| Q5EVM7       | 34765  |
| B4KAU6       | 7230   |
| B4L4L5       | 7230   |
| B4KC72       | 7230   |
| Q6VT85       | 145470 |
| B4IV98       | 7245   |
| B4PQU8       | 7245   |
| B4PQU7       | 7245   |
| B4NA09       | 7260   |
| B4N261       | 7260   |
| B4NKI6       | 7260   |
| B4NKI5       | 7260   |
| O61286       | 51511  |
| Q95YL1       | 51511  |
| Q76EX9       | 51511  |
| B4GMA5       | 7234   |
| B4HAA5       | 7234   |
| B4GZB5       | 7234   |
| B3NJ53       | 7220   |
| B3P978       | 7220   |
| B3P004       | 7220   |
| B3P006       | 7220   |

| symbol Nanog |       |
|--------------|-------|
| B3MWX3       | 7217  |
| B3MYA4       | 7217  |
| B3LVC5       | 7217  |
| B3LVC4       | 7217  |
| B7U5S3       | 8090  |
| B4LVR0       | 7244  |
| B4M2J7       | 7244  |
| B4MBE1       | 7244  |
| B4MBE2       | 7244  |
| B6N2P9       | 7739  |
| B6L3E8       | 7739  |
| B6PK85       | 7739  |
| B4JHS5       | 7222  |
| B4JN60       | 7222  |
| Q7PL95       | 7227  |
| A8Y525       | 7227  |
| Q5BI77       | 7227  |
| A8Y527       | 7227  |
| P22808       | 7227  |
| Q0KHX8       | 7227  |
| Q00401       | 6162  |
| Q00400       | 6162  |
| Q8MUA8       | 63121 |
| A5HKM4       | 6359  |
| Q2WBW8       | 6359  |
| A5HKM5       | 6359  |
| A8KB41       | 7955  |
| B3DFT3       | 7955  |
| B3DG22       | 7955  |
| Q7YTC3       | 10224 |
| Q1PHP8       | 10224 |
| B2GUT3       | 8364  |
| Q28E82       | 8364  |
| Q642T9       | 8364  |
| Q28CW5       | 8364  |
| Q1WKL2       | 8364  |
| B1H161       | 8364  |
| B7ZN41       | 10090 |
| Q0QJG2       | 10090 |
| Q0QJG6       | 10090 |
| Q0QJG5       | 10096 |

| symbol HNF4a |       |
|--------------|-------|
| P49698       | 10090 |
| P22449       | 10116 |
| Q11181       | 9823  |
| Q0ZHH5       | 9823  |
| P41235       | 9606  |
| A5JW41       | 9606  |
| B6ZGT3       | 9606  |
| Q5QP7        | 9606  |

| symbol HNF4a |       |
|--------------|-------|
| Q9JI9        | 64680 |
| Q7YRQ5       | 9913  |
| Q5ILH0       | 9031  |
| Q6PHH5       | 7955  |
| Q8AXB6       | 7955  |
| A8E5K2       | 7955  |
| Q91766       | 8355  |
| B6LWI0       | 7739  |
| Q4H3D4       | 7719  |
| Q4H3D5       | 7719  |
| O46174       | 7091  |
| O46175       | 7091  |
| B3MLY9       | 7217  |
| B4N7T1       | 7260  |
| Q29JT9       | 46245 |
| B4M9N0       | 7244  |
| B4NXH1       | 7245  |
| B3N7D7       | 7220  |
| A8DYX8       | 7227  |
| Q8IPF2       | 7227  |
| Q9VLI7       | 7227  |
| P49866       | 7227  |
| B4HYQ4       | 7238  |
| B4Q787       | 7240  |
| B4KEW7       | 7230  |
| B4GJ59       | 7234  |
| B4JQA2       | 7222  |
| B3S6R0       | 10228 |
| O77100       | 7159  |
| O77099       | 7159  |
| O77101       | 7159  |
| B0WSL6       | 7176  |
| B2RPP8       | 9606  |
| Q5ILG9       | 9031  |
| A7E311       | 9913  |
| B6ZGT4       | 9606  |
| Q059V1       | 10090 |
| Q08CC7       | 7955  |
| Q14541       | 9606  |
| Q3UP48       | 10090 |
| Q7YRQ4       | 9913  |
| Q7Z2V9       | 9606  |
| Q9WUU6       | 10090 |
| A2ICG7       | 10116 |
| B9VVT4       | 10116 |
| B9VVT7       | 10090 |

## CLUSTERS

| symbol GATA6 |        |
|--------------|--------|
| Q92908       | 9606   |
| Q61169       | 10090  |
| P46153       | 10116  |
| P43693       | 9031   |
| Q7T1R5       | 8364   |
| Q6DFL7       | 8355   |
| Q64118       | 8355   |
| Q91678       | 8355   |
| Q6NW63       | 7955   |
| Q9PTJ1       | 7955   |
| B4QXR5       | 7240   |
| A8NI30       | 240176 |
| B0D7V5       | 486041 |
| Q7YUE8       | 6289   |
| Q7YUE7       | 6289   |
| B8PAT0       | 561896 |
| Q09RL2       | 178876 |
| Q09RL3       | 40410  |
| Q5KA62       | 5207   |
| A3GF27       | 4924   |
| A3LNU1       | 4924   |
| P17429       | 162425 |
| Q9HEV3       | 162425 |
| A6MXM0       | 37727  |
| B6QH84       | 441960 |
| B6Q773       | 441960 |
| Q6CIN1       | 28985  |
| Q6CJ53       | 28985  |
| Q6CYD1       | 28985  |
| A5E7R1       | 379508 |
| A5E358       | 379508 |
| B3MXA8       | 7217   |
| P43692       | 9031   |
| P43694       | 9606   |
| P43695       | 8355   |
| P46152       | 10116  |
| P52168       | 7227   |
| Q08369       | 10090  |
| Q0Q0E4       | 9615   |
| Q16TJ4       | 7159   |
| Q294U2       | 46245  |
| Q3SZJ5       | 9913   |
| Q3UQR0       | 10090  |
| Q5M7L8       | 8364   |
| Q5U2V0       | 10116  |
| Q64HK6       | 7668   |
| Q8MIM5       | 9823   |
| Q95VY5       | 7165   |
| Q9BWX5       | 9606   |
| Q9W6U0       | 7955   |
| B4GML7       | 7234   |

| symbol GATA6 |       |
|--------------|-------|
| B4HLE9       | 7238  |
| B4JGA7       | 7222  |
| B4KAG0       | 7230  |
| B4LY20       | 7244  |
| B4NL23       | 7260  |
| B3DL22       | 8364  |
| P43696       | 8355  |
| P70005       | 8355  |
| Q1JQ00       | 7955  |
| Q28FV8       | 8364  |
| Q6GR12       | 8355  |
| Q6GR27       | 8355  |
| Q7T104       | 8355  |
| Q91677       | 8355  |
| A8DS45       | 8128  |
| B7ZKX0       | 9606  |
| B7ZKZ4       | 9606  |
| B9EHF7       | 10090 |
| Q16365       | 9606  |
| Q5IFM8       | 9606  |
| Q8VI87       | 10090 |
| A8WHL1       | 7227  |
| B3P3Y6       | 7220  |
| B4PR51       | 7245  |
| Q8T3J0       | 7227  |
| Q9VEZ8       | 7227  |
| BOWLM8       | 7176  |
| Q5IFI6       | 7159  |
| P97489       | 10090 |
| Q0VGI8       | 10090 |
| Q0VGI0       | 10090 |

| symbol ESRRB |       |
|--------------|-------|
| Q61539       | 10090 |
| P11475       | 10116 |
| Q5F0P8       | 9606  |
| Q5F0P7       | 9606  |
| B6ZGU4       | 9606  |
| O95718       | 9606  |
| A5HNC2       | 8090  |
| A5HNC3       | 8090  |
| Q2I6X3       | 8078  |
| Q2I6X4       | 8078  |
| Q4RR47       | 99883 |
| Q16IU3       | 7159  |
| BOWYX7       | 7176  |
| B4H176       | 7234  |
| Q29FJ2       | 46245 |
| B4N4C7       | 7260  |
| B4J220       | 7222  |
| B4LCB9       | 7244  |

| symbol ESRRB |       |
|--------------|-------|
| Q8WS79       | 7227  |
| Q9VSE9       | 7227  |
| B4HJD7       | 7238  |
| B4PCU1       | 7245  |
| B3NF41       | 7220  |
| B3M9M5       | 7217  |
| B4QLJ3       | 7240  |
| A2RTQ7       | 10090 |
| A0JM86       | 8364  |
| A4IIT9       | 8364  |
| A5HNC1       | 8090  |
| A5HNC4       | 8090  |
| A8K6I2       | 9606  |
| B3KY84       | 9606  |
| B6LPX5       | 7739  |
| B6ZGU5       | 9606  |
| P62508       | 9606  |
| P62509       | 10090 |
| P62510       | 10116 |
| Q2I6X5       | 8078  |
| Q5QIB7       | 10116 |
| Q5RAM2       | 9601  |
| Q5UKY7       | 9031  |
| Q5XTQ9       | 7739  |
| Q6AX97       | 8355  |
| Q6Q6F4       | 7955  |
| Q6Q6F6       | 7955  |
| Q8CCV5       | 10090 |

| symbol SOX7 |        |
|-------------|--------|
| Q7T1L4      | 219752 |
| Q8JFA9      | 8090   |
| Q8JIP0      | 8090   |
| Q8UWL6      | 31033  |
| Q90Z22      | 43700  |
| Q90Z23      | 43700  |
| Q9BG91      | 9483   |
| Q9BG92      | 150249 |
| Q9DE39      | 8022   |
| Q9DFH1      | 7955   |
| Q9YGP7      | 8496   |
| B3DLD3      | 8364   |
| B7ZCS2      | 10090  |
| Q3UND6      | 10090  |
| A8WAC7      | 192075 |
| Q2PZ13      | 8030   |
| Q543C3      | 10090  |
| Q8CBZ8      | 10090  |
| Q8CCB9      | 10090  |
| Q91216      | 8022   |
| B4DKV0      | 9606   |

CLUSTERS

| symbol SOX7 |       |
|-------------|-------|
| Q9BT81      | 9606  |
| P40646      | 10090 |
| Q3U1W5      | 10090 |
| Q3U0W9      | 10090 |
| Q28GD5      | 8364  |
| O42342      | 8355  |
| B7ZSI0      | 8355  |
| B7ZSI1      | 8355  |
| Q6TEN5      | 7955  |
| Q6WNT2      | 31033 |
| Q4RR75      | 99883 |
| B5THP2      | 10224 |
| Q5IAS7      | 7757  |
| B6MX32      | 7739  |
| B6PIM1      | 7739  |
| Q3S378      | 45351 |
| A7RWK8      | 45351 |
| A4IIJ8      | 8364  |
| A5A763      | 9823  |
| B3M1J0      | 7217  |
| O18896      | 9823  |
| O55170      | 10116 |
| O73668      | 9031  |
| P35713      | 9606  |
| P43680      | 10090 |
| P48436      | 9606  |
| P56693      | 9606  |
| P57073      | 9606  |
| P57074      | 9031  |
| P61753      | 9544  |
| Q04886      | 10090 |
| Q04887      | 10090 |
| Q0VC26      | 9913  |
| Q4V7E4      | 10116 |
| Q52W08      | 7955  |
| Q6DFF5      | 8355  |
| Q6F2E7      | 8364  |
| Q6VVD7      | 8355  |
| Q7YRJ7      | 9615  |
| Q8AXX8      | 8355  |
| Q90XD1      | 7955  |
| Q90ZA9      | 9031  |
| Q90ZH7      | 8355  |
| Q90ZH8      | 8355  |
| Q9BG89      | 9598  |
| Q9DFH2      | 7955  |
| Q9VA17      | 7227  |
| Q9W757      | 9031  |
| B7ZR65      | 8355  |
| B7ZR67      | 8355  |
| B7ZR69      | 8355  |

| symbol SOX7 |        |
|-------------|--------|
| Q04888      | 10090  |
| Q0GA74      | 30331  |
| Q5BM60      | 31033  |
| Q6FHW7      | 9606   |
| Q6IZ48      | 99883  |
| Q6V4H7      | 69293  |
| Q6WNT1      | 31033  |
| Q8C916      | 10090  |
| Q90YL1      | 8355   |
| Q9IB79      | 8410   |
| B3P7T4      | 7220   |
| B4GN76      | 7234   |
| B4HZY6      | 7238   |
| B4K6I0      | 7230   |
| B4M5W5      | 7244   |
| B4NFA9      | 7260   |
| B4PN97      | 7245   |
| B4QSI9      | 7240   |
| Q29CD5      | 46245  |
| Q9VA16      | 7227   |
| A8WAC8      | 192075 |
| B0G0U8      | 47969  |
| BOLT38      | 9615   |
| BOLT39      | 9627   |
| BOLT40      | 494514 |
| BOLT41      | 192959 |
| B0M178      | 7764   |
| B1AVH1      | 10090  |
| B4DI77      | 9606   |
| B5ATG2      | 8319   |
| B5B424      | 34903  |
| B7X9J4      | 104659 |
| O57395      | 8022   |
| P48434      | 9031   |
| P61754      | 9600   |
| Q06FD9      | 8296   |
| Q0PV97      | 8081   |
| Q19R19      | 192075 |
| Q2MJB6      | 7757   |
| Q2NM26      | 93934  |
| Q2NM27      | 8839   |
| Q3HRN4      | 211491 |
| Q4F985      | 211488 |
| Q4KSL6      | 8090   |
| Q4LE25      | 8090   |
| Q53Y80      | 9606   |
| Q58FG5      | 7962   |
| Q5FYS4      | 211488 |
| Q6B7J1      | 215347 |
| Q6NXE1      | 7955   |
| Q6WNS8      | 31033  |

| symbol Sox17 |        |
|--------------|--------|
| Q61473       | 10090  |
| Q9H6I2       | 9606   |
| Q3KQ35       | 8355   |
| O42600       | 8355   |
| Q6PAE5       | 8355   |
| Q90ZH9       | 8355   |
| Q8AWH3       | 8364   |
| Q4LES8       | 9031   |
| B8R1E4       | 13489  |
| B8R1E5       | 13489  |
| Q6WNS5       | 31033  |
| Q8JGN3       | 43700  |
| A3FM17       | 57060  |
| A9J6L0       | 228608 |
| Q5PQZ5       | 7955   |
| Q9PTN0       | 7955   |
| Q5IAS7       | 7757   |
| B5THP2       | 10224  |
| B3NRB4       | 7220   |
| P40657       | 7227   |
| B4HR24       | 7238   |
| B4P6N5       | 7245   |
| B3MCMY6      | 7217   |
| B4MPQ9       | 7260   |
| B4LLE3       | 7244   |
| B4KRC4       | 7230   |
| Q28XH5       | 46245  |
| B4GG51       | 7234   |
| B4J7M2       | 7222   |
| Q3S378       | 45351  |
| A7RWK8       | 45351  |
| Q4H2R8       | 7719   |

## CLUSTERS

| symbol GATA3 |        |
|--------------|--------|
| A7RFY2       | 45351  |
| A8PRN4       | 425265 |
| A8Q0N5       | 6279   |
| A9ZND4       | 138676 |
| B0D7V5       | 486041 |
| B0X8S3       | 7176   |
| B2DBE1       | 10116  |
| B3DGG5       | 7955   |
| B3LZW4       | 7217   |
| B3NZW9       | 7220   |
| B3S690       | 10228  |
| B4G4Y3       | 7234   |
| B4HLP8       | 7238   |
| B4JF53       | 7222   |
| B4M159       | 7244   |
| B4NJ90       | 7260   |
| B4PSL4       | 7245   |
| B5X0Q3       | 8030   |
| B6LGL9       | 7739   |
| B7PFW5       | 6945   |
| B7WNQ9       | 9606   |
| B7Z0V4       | 7227   |
| O09100       | 10090  |
| O77156       | 7668   |
| P15976       | 9606   |
| P17678       | 9031   |
| P17679       | 10090  |
| P23769       | 9606   |
| P23770       | 8355   |
| P23771       | 9606   |
| P23772       | 10090  |
| P23773       | 8355   |
| P23824       | 9031   |
| P23825       | 9031   |
| P43429       | 10116  |
| P91623       | 7227   |
| Q08DV0       | 9913   |
| Q0ZHH4       | 9823   |
| Q172Z8       | 7159   |
| Q299A5       | 46245  |
| Q2TAR8       | 8355   |
| Q32NN9       | 8355   |
| Q3B845       | 10090  |
| Q3TZD6       | 10090  |
| Q3TZS0       | 10090  |
| Q3U0R5       | 10090  |
| Q3U223       | 10090  |
| Q3U320       | 10090  |
| Q3UIH9       | 10090  |
| Q4P855       | 5270   |
| Q53YE0       | 9606   |

| symbol GATA3 |       |
|--------------|-------|
| Q59IU1       | 8090  |
| Q5KST7       | 8090  |
| Q5VWG7       | 9606  |
| Q5VWG8       | 9606  |
| Q60I22       | 7764  |
| Q6DG89       | 7955  |
| Q6DIQ6       | 8364  |
| Q6S5H3       | 45351 |
| Q7T3G1       | 7955  |
| Q7TMX8       | 10090 |
| Q865U9       | 9823  |
| Q8QFW5       | 33514 |
| Q91428       | 7955  |
| Q924Y4       | 10116 |
| Q96BH0       | 9606  |
| Q96BH8       | 9606  |
| Q99NH5       | 10116 |
| Q9DBY9       | 10090 |
| Q9DC59       | 10090 |
| Q9P952       | 5334  |

| symbol Runx1 |       |
|--------------|-------|
| Q01196       | 9606  |
| Q03347       | 10090 |
| Q3UM65       | 10090 |
| Q63046       | 10116 |
| Q6PF39       | 8355  |
| Q9DGB8       | 7955  |
| Q6YI83       | 7739  |
| Q6YI85       | 7740  |
| B5LVY9       | 10224 |
| B5AXG5       | 45351 |
| B3RYC8       | 10228 |
| B5AXG6       | 6085  |
| Q0KHQ3       | 7227  |
| B4MSX7       | 7260  |
| B4MSY0       | 7260  |
| B4M3P0       | 7244  |
| B4M3N8       | 7244  |
| B4M225       | 7244  |
| B6S2Q2       | 7159  |
| Q177E8       | 7159  |
| B6S2Q5       | 7159  |
| Q173S1       | 7159  |
| B3NY30       | 7220  |
| B3NT81       | 7220  |
| B3NY28       | 7220  |
| B4H0R3       | 7234  |
| B4H0R7       | 7234  |
| B4GW80       | 7234  |
| B5DLS9       | 46245 |

| symbol Runx1 |        |
|--------------|--------|
| Q29GL5       | 46245  |
| B5DLK1       | 46245  |
| B3N110       | 7217   |
| B3N088       | 7217   |
| B3N111       | 7217   |
| B4L353       | 7230   |
| B4I6A4       | 7238   |
| B4I698       | 7238   |
| B4JXN6       | 7222   |
| B4JXN9       | 7222   |
| B4PYI7       | 7245   |
| B4PYI4       | 7245   |
| B4PWV3       | 7245   |
| Q8MPK9       | 6720   |
| Q8MPK8       | 6720   |
| A1XC55       | 283909 |
| Q6YI39       | 32264  |
| B4R3A1       | 7240   |
| B4R3A9       | 7240   |
| B7PIX2       | 6945   |
| A7UUZ5       | 7165   |
| B0W2H9       | 7176   |
| Q1WKT8       | 7233   |
| Q1WKT7       | 7243   |
| Q676B1       | 34765  |
| B2RMS4       | 9606   |
| Q90813       | 9031   |
| A0A9N7       | 31033  |
| A0A9P0       | 31033  |
| A1YIX8       | 8355   |
| A5HVZ3       | 31033  |
| B3DKD9       | 7955   |
| B5BNX8       | 8364   |
| Q13950       | 9606   |
| Q3L8U3       | 7955   |
| Q4VW83       | 7955   |
| Q4VW84       | 7955   |
| Q5T802       | 9606   |
| Q642Y3       | 31033  |
| Q6TYZ3       | 7955   |
| Q6TYZ4       | 7955   |
| Q6U1J2       | 7955   |
| Q6U1J3       | 7955   |
| Q8AY99       | 99883  |
| Q8JFD4       | 31033  |
| Q8UVG3       | 9031   |
| Q8UWC8       | 9031   |
| Q9DEF2       | 8090   |
| A0A9P3       | 31033  |

CLUSTERS

| symbol ID2 |       |
|------------|-------|
| P41136     | 10090 |
| Q6QAE9     | 10036 |
| P41137     | 10116 |
| Q5RCH7     | 9601  |
| Q4R5J7     | 9541  |
| Q02363     | 9606  |
| Q53T66     | 9606  |
| Q3ZC46     | 9913  |
| Q2VIU1     | 9823  |
| O73933     | 9031  |
| Q3LSV1     | 93934 |
| Q6PBD7     | 8364  |
| B9EQ26     | 8030  |
| B9EM42     | 8030  |
| B9ELK6     | 8030  |
| Q9PWJ5     | 8355  |
| Q9YGL0     | 8355  |
| Q66J78     | 8355  |
| Q4VKK3     | 8022  |
| O42448     | 8022  |
| Q7SZQ2     | 7955  |
| Q9W619     | 8330  |
| Q4RM81     | 99883 |
| B6MX35     | 7739  |
| A8U072     | 7757  |
| B7QIB0     | 6945  |
| Q545T4     | 10090 |
| A4IF68     | 9913  |
| A7RVE5     | 45351 |
| B3MAE9     | 7217  |
| O42361     | 7955  |
| P18491     | 7227  |
| P41133     | 10090 |
| P41134     | 9606  |
| P41135     | 10116 |
| P41138     | 10116 |
| P41139     | 10090 |
| P47928     | 9606  |
| Q02535     | 9606  |
| Q06AV5     | 9823  |
| Q17HE4     | 7159  |
| Q29DX0     | 46245 |
| Q32PN8     | 7955  |
| Q5E981     | 9913  |
| Q5TX46     | 7165  |
| Q688C4     | 8364  |
| Q6GL62     | 8364  |
| Q6GTZ3     | 10090 |
| Q6PBJ0     | 7955  |
| Q712G9     | 9615  |
| Q7SZ28     | 8355  |

| symbol ID2 |       |
|------------|-------|
| Q7ZXF3     | 8355  |
| Q8CH17     | 10116 |
| Q8QFX4     | 7955  |
| Q90X12     | 9031  |
| Q90X14     | 9031  |
| Q90X15     | 9031  |
| Q91399     | 8355  |
| A0JPJ2     | 10116 |
| A8K537     | 9606  |
| B3W6M6     | 9823  |
| B5X5B7     | 8030  |
| B5X7U5     | 8030  |
| B9ELA7     | 8030  |
| O42447     | 8022  |
| Q4VKK4     | 8022  |
| Q6IQW5     | 7955  |
| Q6VV65     | 8022  |
| B3NJB6     | 7220  |
| B4H496     | 7234  |
| B4HVJ7     | 7238  |
| B4PCN1     | 7245  |
| B4QLF2     | 7240  |
| Q7ZZB5     | 8355  |
| A8K1T8     | 9606  |
| B3W6M8     | 9823  |
| Q545W1     | 10090 |
| Q91417     | 8355  |
| Q9W620     | 8330  |
| Q9Z2W6     | 10116 |
| A2AHY3     | 10090 |
| P20067     | 10090 |
| Q544D2     | 10090 |
| B0WIA4     | 7176  |
| Q2F6A3     | 7091  |
| Q4V970     | 7955  |
| Q7T164     | 7955  |
| Q90X13     | 9031  |

| symbol CTBP1 |       |
|--------------|-------|
| O88712       | 10090 |
| Q56P31       | 9091  |
| Q9YHU0       | 8355  |
| Q5XHH5       | 8355  |
| Q13363       | 9606  |
| Q4KMQ8       | 9606  |
| Q7Z2Q5       | 9606  |
| Q66KL2       | 8364  |
| Q5ZIZ6       | 9031  |
| Q1RLQ4       | 7955  |
| Q17A41       | 7159  |

| symbol CTBP1 |       |
|--------------|-------|
| A8Q0T8       | 6279  |
| Q20595       | 6239  |
| Q9Z2F5       | 10116 |
| B3LW50       | 7217  |
| B3P196       | 7220  |
| B4G5K5       | 7234  |
| B4HGC4       | 7238  |
| B4JEW9       | 7222  |
| B4K8I6       | 7230  |
| B4M3U9       | 7244  |
| B4N9Y3       | 7260  |
| B4PPV3       | 7245  |
| B4R1X7       | 7240  |
| O46036       | 7227  |
| P56545       | 9606  |
| P56546       | 10090 |
| Q0VCQ1       | 9913  |
| Q28DQ9       | 8364  |
| Q299Q6       | 46245 |
| Q5ZMM8       | 9031  |
| Q640R6       | 8364  |
| Q7ZU55       | 7955  |
| Q9EQH5       | 10116 |
| Q9W758       | 8355  |
| A4V2S3       | 7227  |
| A9UL56       | 7955  |
| Q3UGL5       | 10090 |
| Q3UIX8       | 10090 |
| Q4RE44       | 99883 |
| Q56P32       | 9091  |
| Q5BU17       | 7955  |
| Q5BU18       | 7955  |
| Q5SQP8       | 9606  |
| Q6AZ26       | 10116 |
| Q6NZ25       | 7955  |
| Q7SZN5       | 7955  |
| Q7ZVY6       | 7955  |
| Q8IY44       | 9606  |
| Q91YZ2       | 10090 |
| Q9DEG6       | 7955  |
| Q9DEG7       | 7955  |

## CLUSTERS

| symbol CGB |        |
|------------|--------|
| P01233     | 9606   |
| B7FDQ4     | 9515   |
| B7FDQ3     | 9515   |
| Q14DX4     | 175797 |
| Q14DX3     | 175797 |
| Q9DG80     | 7998   |
| Q9DG92     | 8022   |
| P53543     | 13013  |
| P10256     | 8018   |
| Q5GJ78     | 62067  |
| P48253     | 8020   |
| P07732     | 74940  |
| A1ILL7     | 146921 |
| A6NKQ9     | 9606   |
| Q9GL37     | 9544   |
| Q6NT52     | 9606   |
| A1A5E0     | 9606   |
| B4XAN0     | 9598   |
| B4XAN2     | 9598   |
| B4XAN3     | 9598   |
| B4XAN4     | 9598   |
| B6VAC5     | 89462  |
| B7FDP5     | 9521   |
| B7FDP6     | 9521   |
| B7FDP7     | 9487   |
| B7FDP8     | 9487   |
| B7FDP9     | 9490   |
| B7FDQ0     | 9490   |
| B7FDQ1     | 9483   |
| B7FDQ2     | 9483   |
| O09108     | 10090  |
| O46482     | 9337   |
| O46641     | 9790   |
| O77805     | 9685   |
| O77835     | 9807   |
| P01229     | 9606   |
| P01230     | 10116  |
| P01231     | 9940   |
| P01232     | 9823   |
| P04651     | 9913   |
| P07434     | 9555   |
| P08751     | 9796   |
| P19794     | 9793   |
| P51500     | 9483   |
| Q19PY6     | 30521  |
| Q1EPQ9     | 10160  |
| Q1EPR3     | 79202  |
| Q1HG61     | 89462  |
| Q1RP71     | 9925   |
| Q2HWE4     | 10044  |
| Q2L4U0     | 10029  |

| symbol CGB |       |
|------------|-------|
| Q2Q1P0     | 9600  |
| Q2Q1P1     | 9595  |
| Q2Q1P2     | 9598  |
| Q3HRV3     | 37293 |
| Q3MU78     | 9986  |
| Q3S2X5     | 39432 |
| Q3UUG9     | 10090 |
| Q400N5     | 10032 |
| Q62778     | 10116 |
| Q6EV78     | 9541  |
| Q6IY74     | 9986  |
| Q6UJC1     | 10047 |
| Q6V3B5     | 10036 |
| Q6V3B6     | 35658 |
| Q7JHA3     | 9986  |
| Q8HZR9     | 9649  |
| Q8WN18     | 9646  |
| Q924A8     | 10141 |
| Q95J85     | 13616 |
| Q9BDI9     | 74533 |
| Q9BEH1     | 9541  |
| Q9BEH2     | 9541  |

| symbol Cdh1 |       |
|-------------|-------|
| P09803      | 10090 |
| Q9R0T4      | 10116 |
| A6QLC4      | 9913  |
| Q6R8F2      | 9913  |
| P12830      | 9606  |
| A8K1U7      | 9606  |
| Q9UII7      | 9606  |
| B3GN61      | 9606  |
| Q9UII8      | 9606  |
| Q5RAX1      | 9601  |
| P08641      | 9031  |
| P33148      | 8355  |
| Q6NTM0      | 8355  |
| P33152      | 8355  |
| Q90Z37      | 7955  |
| Q4T7X6      | 99883 |
| Q4KML8      | 10090 |
| B2R6F4      | 9606  |
| B4DLF0      | 9606  |
| P10287      | 10090 |
| P22223      | 9606  |
| P30944      | 8355  |
| Q8BRE1      | 10090 |
| Q8BSL6      | 10090 |

| symbol TDGF1 |       |
|--------------|-------|
| P13385       | 9606  |
| Q8TCC1       | 9606  |
| B2R8C7       | 9606  |
| P51864       | 9606  |
| Q58D57       | 9913  |
| P51865       | 10090 |
| Q7TQ06       | 10090 |
| Q3UZP8       | 10090 |
| O57516       | 7955  |
| A9UMD1       | 8364  |
| BOJZQ5       | 8364  |
| Q0V9F3       | 8364  |
| Q91649       | 8355  |
| B7ZQM8       | 8355  |
| Q504I5       | 7955  |
| O57517       | 7955  |
| A7MCB2       | 7955  |

| symbol LIF |        |
|------------|--------|
| P15018     | 9606   |
| O62728     | 452646 |
| Q27956     | 9913   |
| Q9GKZ8     | 9823   |
| Q256Y4     | 47230  |
| P17777     | 10116  |
| O88211     | 10116  |
| P09056     | 10090  |
| Q5SQP3     | 10090  |
| Q3U1H5     | 10090  |
| Q64015     | 10095  |
| B2RCW7     | 9606   |

| symbol NFKB1 |        |
|--------------|--------|
| P19838       | 9606   |
| B2RRQ6       | 10090  |
| P25799       | 10090  |
| Q66IP9       | 8355   |
| B5M235       | 10224  |
| B1NA65       | 6689   |
| Q6DF61       | 8364   |
| Q04861       | 9031   |
| Q0PHA8       | 9823   |
| Q1KNJ0       | 9913   |
| Q6F3J0       | 9615   |
| A3FJ60       | 119488 |
| A7XNS1       | 9823   |
| A7Z034       | 9913   |
| A8K5Y5       | 9606   |
| B3KVE8       | 9606   |
| O13075       | 9031   |

## CLUSTERS

| symbol Prkaca (PKA) |        |
|---------------------|--------|
| P05132              | 10090  |
| A1L1M0              | 10116  |
| P27791              | 10116  |
| P25321              | 10029  |
| P17612              | 9606   |
| Q9MZD9              | 9940   |
| P00517              | 9913   |
| P36887              | 9823   |
| Q8MJ44              | 9615   |
| Q95J97              | 9986   |
| Q6DE61              | 8355   |
| Q90WN3              | 8355   |
| Q28GZ8              | 8364   |
| A3KMS9              | 7955   |
| Q6DBV8              | 7955   |
| B6LG32              | 7739   |
| B6PNX0              | 7739   |
| Q16958              | 6500   |
| Q16957              | 6500   |
| Q4JIV3              | 6523   |
| Q4R0Q2              | 34608  |
| Q4R0Q0              | 34608  |
| Q4R0Q1              | 34608  |
| A5JNM1              | 7091   |
| B3N8G6              | 7220   |
| O97114              | 6943   |
| O97115              | 6943   |
| O97116              | 6943   |
| Q1HQW4              | 7159   |
| Q16933              | 29170  |
| Q4AC21              | 216498 |
| P12370              | 7227   |
| A4V0I0              | 7227   |
| B4Q7V0              | 7240   |
| B4JCE3              | 7222   |
| Q9NAS6              | 88217  |
| Q25115              | 7650   |
| P21137              | 6239   |
| B4KH13              | 7230   |
| Q7PXF7              | 7165   |
| Q55ZX5              | 5207   |
| Q5KP84              | 5207   |
| O42793              | 5466   |
| Q75T36              | 5462   |
| Q0PKT8              | 474922 |
| Q6BK94              | 4959   |
| Q6BWC6              | 4959   |
| A3FM70              | 117187 |
| A5DAZ1              | 4929   |
| A5DES7              | 4929   |
| Q9HEW0              | 5476   |

| symbol Prkaca (PKA) |        |
|---------------------|--------|
| Q9P932              | 5476   |
| Q59Z23              | 5476   |
| Q5AP71              | 5476   |
| Q9Y777              | 5530   |
| Q6CS82              | 28985  |
| Q6CW38              | 28985  |
| A3LYD5              | 4924   |
| A3LPK9              | 4924   |
| Q6FSP1              | 5478   |
| Q6FJ83              | 5478   |
| A5DYL9              | 379508 |
| A5DT69              | 379508 |
| Q8J0I6              | 178876 |
| B3MUX5              | 7217   |
| B4NY66              | 7245   |
| B4HW89              | 7238   |
| B4M9H6              | 7244   |
| Q29NB1              | 46245  |
| B4MVA0              | 7260   |
| B4G7Y8              | 7234   |
| B0XFG0              | 7176   |
| A1DHC5              | 331117 |
| A2QCP3              | 425011 |
| A4R8U5              | 148305 |
| A6S414              | 332648 |
| A6SCB0              | 332648 |
| A7F7J7              | 325569 |
| A7SM62              | 45351  |
| A7TFJ0              | 436907 |
| A7TJ45              | 436907 |
| A8Q8C9              | 425265 |
| A9UQT5              | 81824  |
| B0D3V5              | 486041 |
| B0DXZ2              | 486041 |
| B2AUF3              | 5145   |
| B3M9V2              | 7217   |
| B3MT87              | 7217   |
| O13367              | 5270   |
| O43930              | 9606   |
| P05131              | 9913   |
| P05986              | 4932   |
| P06244              | 4932   |
| P06245              | 4932   |
| P16911              | 7227   |
| P16912              | 7227   |
| P22612              | 9606   |
| P22694              | 9606   |
| P40376              | 4896   |
| P51817              | 9606   |
| P68181              | 10090  |
| P68182              | 10116  |

| symbol Prkaca (PKA) |        |
|---------------------|--------|
| Q16NW2              | 7159   |
| Q29CB1              | 46245  |
| Q2UEY6              | 5062   |
| Q3ZB92              | 7955   |
| Q4X0V1              | 5085   |
| Q55MZ9              | 5207   |
| Q5BK52              | 10116  |
| Q5KBC8              | 5207   |
| Q6CCL9              | 4952   |
| Q755B5              | 33169  |
| Q758E1              | 33169  |
| Q7JP68              | 6239   |
| Q7T374              | 7955   |
| Q7ZWV0              | 8355   |
| Q8SRK8              | 6035   |
| Q922R0              | 10090  |
| Q99079              | 5270   |
| Q9P466              | 5141   |
| Q9P472              | 162425 |
| A1C6Q4              | 5057   |
| A6ZQG8              | 307796 |
| A6ZW51              | 307796 |
| A6ZZF8              | 307796 |
| B0LW64              | 5599   |
| B0XSP3              | 451804 |
| B2WHZ4              | 426418 |
| B3LKM6              | 285006 |
| B3LPV9              | 285006 |
| B3LQT8              | 285006 |
| B5VL21              | 545124 |
| B5VSX7              | 545124 |
| B6HHD2              | 500485 |
| B6QK74              | 441960 |
| B8MLH4              | 441959 |
| B8NH99              | 332952 |
| P87077              | 5061   |
| Q01143              | 148305 |
| Q0CYS7              | 341663 |
| Q0U5G3              | 13684  |
| Q1DWD0              | 5501   |
| Q1KTF1              | 54734  |
| Q8J129              | 5085   |
| Q96UM3              | 5085   |
| Q9HGU6              | 34373  |
| Q9UUS9              | 62688  |
| A6QNX4              | 9913   |
| A8K8B9              | 9606   |
| B2RB89              | 9606   |
| B4DKB0              | 9606   |
| B4E2L0              | 9606   |
| B7ZA00              | 9606   |



## CLUSTERS

| <b>symbol Prkaca (PKA)</b> |        |
|----------------------------|--------|
| P05383                     | 9823   |
| P68180                     | 10029  |
| Q5R472                     | 9601   |
| Q5R9Y7                     | 9601   |
| Q5RC73                     | 9601   |
| Q800K1                     | 8022   |
| A6R2N1                     | 339724 |
| Q5DF14                     | 6182   |
| A8N588                     | 240176 |
| Q12741                     | 4808   |
| Q8NIL1                     | 40410  |
| Q9HFW0                     | 40410  |
| A1DEX4                     | 331117 |
| A7ECY2                     | 325569 |
| B0Y409                     | 451804 |
| Q1DSD8                     | 5501   |
| Q2H4R5                     | 38033  |
| Q2KFU8                     | 242507 |
| Q5B413                     | 162425 |
| Q6QE15                     | 5180   |
| Q70KQ0                     | 5085   |
| Q7SHX1                     | 5141   |
| Q86ZN6                     | 148305 |
| B3NDN9                     | 7220   |
| B4ITX2                     | 7245   |
| B4PD13                     | 7245   |
| B4QLR0                     | 7240   |
| Q194S5                     | 7227   |
| B1AVU0                     | 10090  |
| B1AVU1                     | 10090  |
| Q3UDT1                     | 10090  |
| Q4RY94                     | 99883  |
| B4HIK7                     | 7238   |
| B6K6I0                     | 402676 |
| B1APG3                     | 9606   |
| Q5DDU1                     | 6182   |
| B4GNC3                     | 7234   |
| B1APG4                     | 9606   |
| Q8NIK9                     | 40410  |
| P49673                     | 6253   |
| Q20541                     | 6239   |
| Q8MQ39                     | 6239   |

| <b>symbol TCF3</b> |       |
|--------------------|-------|
| P15923             | 9606  |
| P15806             | 10090 |
| P98180             | 10036 |
| P21677             | 10116 |
| Q68G29             | 10116 |
| Q70IK3             | 9031  |
| Q5ZL14             | 9031  |
| Q70IK2             | 9031  |
| Q01978             | 8355  |
| Q7ZXY5             | 8355  |
| A4IIL6             | 8364  |
| Q56R80             | 7998  |
| Q32T22             | 7998  |
| B1H1L4             | 7955  |
| B3MJG5             | 7217  |
| B0WJ83             | 7176  |
| Q17588             | 6239  |
| Q17358             | 6239  |
| Q17326             | 6239  |
| A0JN84             | 9913  |
| P11420             | 7227  |
| P15881             | 9615  |
| P15884             | 9606  |
| P51514             | 10116 |
| Q16TH4             | 7159  |
| Q3ZBP9             | 9913  |
| Q4H3N7             | 7719  |
| Q60722             | 10090 |
| Q61286             | 10090 |
| Q62655             | 10116 |
| Q6NSM7             | 7955  |
| Q99081             | 9606  |
| A6QPK5             | 9913  |
| B3KT62             | 9606  |
| B3KUC0             | 9606  |
| B3KVA4             | 9606  |
| B4DZH5             | 9606  |
| B7Z5M6             | 9606  |
| B7Z6Y1             | 9606  |
| Q0V9M4             | 8364  |
| Q3UZE5             | 10090 |
| Q641A7             | 8355  |
| Q86TC1             | 9606  |
| Q8CE98             | 10090 |
| B3N9N6             | 7220  |
| B4HWN1             | 7238  |
| B4JP31             | 7222  |
| B4MG51             | 7244  |
| B4NGK5             | 7260  |
| B4NZN2             | 7245  |
| B7FNPO             | 7227  |

| <b>symbol TCF3</b> |       |
|--------------------|-------|
| Q29CW9             | 46245 |
| Q86PA6             | 7227  |
| Q2TB39             | 9606  |
| Q6QR57             | 7998  |
| Q6QR58             | 7998  |
| Q86VM2             | 9606  |
| Q16TH3             | 7159  |
| B4DT37             | 9606  |
| B4DUG3             | 9606  |
| B4E1W1             | 9606  |
| Q8K1X3             | 10090 |
| Q91XK1             | 10090 |
| Q91YV0             | 10090 |

| <b>symbol Yap1</b> |       |
|--------------------|-------|
| P46938             | 10090 |
| Q2EJA0             | 10116 |
| Q7Z574             | 9606  |
| Q8IUY9             | 9606  |
| A1L1U5             | 7955  |
| Q1L8J7             | 7955  |
| P46936             | 9031  |
| Q32NJ6             | 8355  |
| B6NNB9             | 7739  |
| B2CMB6             | 7091  |
| A7SLN5             | 45351 |
| B4PAT4             | 7245  |
| Q45VV3             | 7227  |
| Q0E8X1             | 7227  |
| Q95TU5             | 7227  |
| A2RVH0             | 7227  |
| A2RVH4             | 7227  |
| Q7KVG6             | 7227  |
| B3NQ71             | 7220  |
| B4I2C6             | 7238  |
| Q5TR76             | 7165  |
| B7PRF1             | 6945  |
| P46937             | 9606  |

CLUSTERS

| symbol PRKCA (aPKC) |        |
|---------------------|--------|
| A0JM65              | 8364   |
| A0JNZ5              | 10090  |
| A1CBE3              | 5057   |
| A1DDZ6              | 331117 |
| A2RA98              | 425011 |
| A3GHJ5              | 4924   |
| A4QQ12              | 148305 |
| A5D7N0              | 9913   |
| A6QZ29              | 339724 |
| A6S4G3              | 332648 |
| A6ZKJ9              | 307796 |
| A7F8U5              | 325569 |
| A7TMA2              | 436907 |
| A8DYG9              | 7227   |
| A8KBH6              | 8364   |
| A8PPV9              | 6279   |
| A8Q595              | 425265 |
| A9L903              | 9555   |
| A9V750              | 81824  |
| B0CVH0              | 486041 |
| B0JYP1              | 9913   |
| B0Y142              | 451804 |
| B1MTW7              | 9523   |
| B2AMZ1              | 5145   |
| B2KIL5              | 59479  |
| B2R5T1              | 9606   |
| B2VTM3              | 426418 |
| B3LNN5              | 285006 |
| B3MD92              | 7217   |
| B3MD93              | 7217   |
| B3NP50              | 7220   |
| B3NP51              | 7220   |
| B3RFF0              | 42254  |
| B3RQ26              | 10228  |
| B4GBQ2              | 7234   |
| B4GBQ5              | 7234   |
| B4HTB2              | 7238   |
| B4HTB4              | 7238   |
| B4JVL2              | 7222   |
| B4JVL3              | 7222   |
| B4KSR0              | 7230   |
| B4KSR1              | 7230   |
| B4LP68              | 7244   |
| B4LP69              | 7244   |
| B4MR94              | 7260   |
| B4MR97              | 7260   |
| B4P5T9              | 7245   |
| B4P8K3              | 7245   |
| B4QIH6              | 7240   |
| B4QIH7              | 7240   |
| B5BU22              | 9606   |

| symbol PRKCA (aPKC) |        |
|---------------------|--------|
| B5DFC4              | 10116  |
| B5FWA6              | 30611  |
| B5VDP0              | 545124 |
| B6HK33              | 500485 |
| B6JW41              | 402676 |
| B6Q4R3              | 441960 |
| B7NZS1              | 9986   |
| B7PWS6              | 6945   |
| B7SJR4              | 7141   |
| B7Z3V9              | 9606   |
| B7Z3W6              | 9606   |
| B8LXH5              | 441959 |
| B8NKP5              | 332952 |
| O01715              | 6087   |
| O42632              | 5016   |
| O61224              | 56443  |
| O76850              | 7373   |
| P04409              | 9913   |
| P05126              | 9913   |
| P05129              | 9606   |
| P05130              | 7227   |
| P05696              | 10116  |
| P05771              | 9606   |
| P05772              | 9986   |
| P10102              | 9986   |
| P10829              | 9986   |
| P13677              | 7227   |
| P17252              | 9606   |
| P20444              | 10090  |
| P24583              | 4932   |
| P36583              | 4896   |
| P43057              | 5476   |
| P63318              | 10090  |
| P63319              | 10116  |
| P68403              | 10116  |
| P68404              | 10090  |
| P87253              | 5141   |
| P90980              | 6239   |
| Q00078              | 5061   |
| Q0CW56              | 341663 |
| Q0UME1              | 13684  |
| Q16974              | 6500   |
| Q17M58              | 7159   |
| Q1DKF7              | 5501   |
| Q25378              | 7653   |
| Q290K1              | 46245  |
| Q290K2              | 46245  |
| Q2H265              | 38033  |
| Q2PJA7              | 6239   |
| Q2TSD3              | 9606   |
| Q2U6A7              | 5062   |

| symbol PRKCA (aPKC) |        |
|---------------------|--------|
| Q3UN66              | 10090  |
| Q4AED6              | 7091   |
| Q4R4U2              | 9541   |
| Q4VA93              | 10090  |
| Q4WVG0              | 5085   |
| Q55VU6              | 5207   |
| Q5ANK2              | 5476   |
| Q5BH74              | 162425 |
| Q5F3X1              | 9031   |
| Q5KKE3              | 5207   |
| Q6AZF7              | 8355   |
| Q6BI27              | 4959   |
| Q6C292              | 4952   |
| Q6FJ43              | 5478   |
| Q6UB96              | 40410  |
| Q6UB97              | 178876 |
| Q75BT0              | 33169  |
| Q76G54              | 162425 |
| Q7LZQ8              | 8355   |
| Q7LZQ9              | 8355   |
| Q7SY24              | 7955   |
| Q7T2C5              | 7955   |
| Q873Y9              | 5022   |
| Q8J213              | 28985  |
| Q8JFZ9              | 31033  |
| Q99014              | 51453  |
| Q9HF10              | 34373  |
| Q9HGK8              | 42251  |
| Q9UVJ5              | 40559  |
| Q9Y792              | 29908  |
| Q9Y7C1              | 148305 |

| symbol LIFR |       |
|-------------|-------|
| P42702      | 9606  |
| Q5XNR9      | 9615  |
| P42703      | 10090 |
| Q3U234      | 10090 |
| O70535      | 10116 |
| Q8QFQ7      | 9031  |
| A2CE47      | 7955  |
| Q58EK6      | 7955  |
| A8WH83      | 7955  |
| Q6UAM7      | 99883 |
| Q4RPS1      | 99883 |
| A8K1Z4      | 9606  |

## CLUSTERS

| symbol TLE2 |       |
|-------------|-------|
| Q04725      | 9606  |
| Q9WVB2      | 10090 |
| Q3UN01      | 10090 |
| Q496Z7      | 10116 |
| B3RR30      | 10228 |
| O13166      | 7955  |
| P16371      | 7227  |
| Q296Z2      | 46245 |
| B1H1Y7      | 8355  |
| B3DGV3      | 7955  |
| B3KUA2      | 9606  |
| B4DPT0      | 9606  |
| B5THN7      | 10224 |
| O42469      | 8355  |
| Q04726      | 9606  |
| Q08122      | 10090 |
| Q1LXH1      | 7955  |
| Q3LFR4      | 31033 |
| Q3TY99      | 10090 |
| Q5FV99      | 8364  |
| Q6DEF0      | 8355  |
| Q6PHP0      | 10090 |
| Q6PI57      | 9606  |
| Q6PRX2      | 9606  |
| Q6PRX3      | 9606  |
| Q98TH2      | 7955  |
| Q9D GK0     | 8355  |
| Q9JIT3      | 10116 |
| B0WQA4      | 7176  |
| B3LY32      | 7217  |
| B3P6A6      | 7220  |
| B4GEG0      | 7234  |
| B4ICI5      | 7238  |
| B4JGJ3      | 7222  |
| B4LYS6      | 7244  |
| B4NK36      | 7260  |
| B4PSX2      | 7245  |
| B4QW19      | 7240  |
| Q17BC6      | 7159  |
| Q5UBX7      | 7654  |
| Q7PMQ2      | 7165  |

| symbol ACTR3 (ARP3) |        |
|---------------------|--------|
| P61158              | 9606   |
| Q5R8R1              | 9601   |
| P61157              | 9913   |
| Q4V7C7              | 10116  |
| Q99JY9              | 10090  |
| Q3ULF7              | 10090  |
| B5APU4              | 9823   |
| Q90WD0              | 9031   |
| Q4RK67              | 99883  |
| Q6P309              | 8364   |
| Q6PUQ3              | 7955   |
| Q8JGM2              | 7955   |
| Q801P7              | 8355   |
| O73723              | 31033  |
| B6PL52              | 7739   |
| A3QX13              | 55567  |
| A7S3B3              | 45351  |
| Q9U5H4              | 7650   |
| B4LGZ8              | 7244   |
| Q7PQ13              | 7165   |
| Q16MG7              | 7159   |
| B0XB57              | 7176   |
| B0X7Y3              | 7176   |
| B3M425              | 7217   |
| B4KWX4              | 7230   |
| B4PCS6              | 7245   |
| B3NF57              | 7220   |
| P32392              | 7227   |
| B4HIZ2              | 7238   |
| Q29FE3              | 46245  |
| B4H1G3              | 7234   |
| B4IWR1              | 7222   |
| B4MXD7              | 7260   |
| B3RR76              | 10228  |
| A9V006              | 81824  |
| Q9N4I0              | 6239   |
| Q61WW9              | 6238   |
| A8P700              | 6279   |
| A8NTZ1              | 240176 |
| B0DA04              | 486041 |
| Q6C3K0              | 4952   |
| Q2UEC7              | 5062   |
| B8NH60              | 332952 |
| B0Y102              | 451804 |
| A1DE34              | 331117 |
| A2RAH8              | 425011 |
| Q4WVC0              | 5085   |
| A3LYF0              | 4924   |
| Q0CW19              | 341663 |
| A1CBA8              | 5057   |
| A6S1U1              | 332648 |

| symbol ACTR3 (ARP3) |        |
|---------------------|--------|
| B6HIY6              | 500485 |
| P78712              | 5141   |
| B6Q5H3              | 441960 |
| A8QCN6              | 425265 |
| Q6FUU8              | 5478   |
| Q2GPB8              | 38033  |
| Q5BH40              | 162425 |
| Q4PFS9              | 5270   |
| B2B0V9              | 5145   |
| A4R4C8              | 148305 |
| B4NT15              | 7240   |
| Q53QM2              | 9606   |
| Q59Z11              | 5476   |
| A5DAY0              | 4929   |
| B8LT18              | 441959 |

| symbol PARD3 |       |
|--------------|-------|
| A2BEM5       | 7955  |
| A2BEM6       | 7955  |
| A2BEM7       | 7955  |
| A5D6P2       | 10090 |
| A7RRU6       | 45351 |
| B2RUK1       | 10090 |
| B3MW54       | 7217  |
| B3NWC4       | 7220  |
| B4GY90       | 7234  |
| B4JKF9       | 7222  |
| B4NC67       | 7260  |
| B4Q264       | 7245  |
| B7ZNY3       | 10090 |
| O96782       | 7227  |
| Q0KHR3       | 7227  |
| Q0PVE6       | 9031  |
| Q17353       | 6239  |
| Q29HU6       | 46245 |
| Q5VWV0       | 9606  |
| Q5VWV1       | 9606  |
| Q5VWV2       | 9606  |
| Q5VWV4       | 9606  |
| Q5VWV5       | 9606  |
| Q6GN19       | 8355  |
| Q6IQ47       | 9606  |
| Q6QUY1       | 7955  |
| Q6QUY2       | 7955  |
| Q7T1R3       | 7955  |
| Q8TEW0       | 9606  |
| Q99NH2       | 10090 |
| Q9VX75       | 7227  |
| Q9Z340       | 10116 |

CLUSTERS

| symbol Gata4 |        |
|--------------|--------|
| Q08369       | 10090  |
| B9EHF7       | 10090  |
| Q8VI87       | 10090  |
| Q3UYJ1       | 10090  |
| P46152       | 10116  |
| P43694       | 9606   |
| B7ZKX0       | 9606   |
| Q5IFM8       | 9606   |
| B7ZKZ4       | 9606   |
| Q0Q0E4       | 9615   |
| Q8MIM5       | 9823   |
| B3DL22       | 8364   |
| Q28FV8       | 8364   |
| Q6GR27       | 8355   |
| Q91677       | 8355   |
| Q6GR12       | 8355   |
| A8DS45       | 8128   |
| Q09JY7       | 7955   |
| B8JKU1       | 7955   |
| Q9PTJ2       | 7955   |
| Q4RR24       | 99883  |
| B0LD06       | 283909 |
| B3MXA8       | 7217   |
| Q9NJ18       | 7213   |
| Q294U2       | 46245  |
| B4GML7       | 7234   |
| B4HLE9       | 7238   |
| B4PR51       | 7245   |
| B4NL23       | 7260   |
| B0WLM8       | 7176   |
| Q16TJ4       | 7159   |
| Q5IFI6       | 7159   |
| P52167       | 7091   |
| B6K6C1       | 402676 |
| Q95VY5       | 7165   |
| P52168       | 7227   |
| A8WHL1       | 7227   |
| Q9VEZ8       | 7227   |
| Q8T3J0       | 7227   |
| Q4H3F6       | 7719   |
| P43692       | 9031   |
| P43693       | 9031   |
| P43695       | 8355   |
| P46153       | 10116  |
| Q3SZJ5       | 9913   |
| Q3UQR0       | 10090  |
| Q5M7L8       | 8364   |
| Q5U2V0       | 10116  |
| Q61169       | 10090  |
| Q64118       | 8355   |
| Q64HK6       | 7668   |

| symbol Gata4 |       |
|--------------|-------|
| Q7T1R5       | 8364  |
| Q92908       | 9606  |
| Q9BWX5       | 9606  |
| Q9PTJ1       | 7955  |
| Q9W6U0       | 7955  |
| B4JGA7       | 7222  |
| B4KAG0       | 7230  |
| B4LY20       | 7244  |
| P43696       | 8355  |
| P70005       | 8355  |
| Q1JQ00       | 7955  |
| Q6DFL7       | 8355  |
| Q6NW63       | 7955  |
| Q7T104       | 8355  |
| Q91678       | 8355  |
| Q16365       | 9606  |
| B3P3Y6       | 7220  |
| P97489       | 10090 |
| Q0VGI8       | 10090 |
| Q0VGI0       | 10090 |

| symbol Jak2 |       |
|-------------|-------|
| Q62120      | 10090 |
| Q62689      | 10116 |
| O19064      | 9823  |
| O60674      | 9606  |
| Q506Q0      | 9606  |
| A8K910      | 9606  |
| Q8IXP2      | 9606  |
| Q5RB23      | 9601  |
| Q75R65      | 9031  |
| A0JM01      | 8364  |
| Q9PVI2      | 47145 |
| O93596      | 7955  |
| Q4FZX4      | 8355  |
| Q9PTN6      | 7962  |
| B6N510      | 7739  |
| Q4H3A3      | 7719  |
| B4L4A0      | 7230  |
| B4MCI4      | 7244  |
| Q29H22      | 46245 |
| B4NE99      | 7260  |
| B4NC66      | 7260  |
| B3N089      | 7217  |
| Q24592      | 7227  |
| B4DYV1      | 9606  |
| Q9TTI9      | 9823  |
| Q9TTJ0      | 9823  |
| B3NUE4      | 7220  |
| B4PYC0      | 7245  |

| symbol LATS2 |       |
|--------------|-------|
| Q9NRM7       | 9606  |
| Q7TSJ6       | 10090 |
| B2BJC0       | 7955  |
| B2BJC1       | 7955  |
| B0S8I4       | 7955  |
| A4III9       | 8364  |
| Q4RTQ1       | 99883 |
| B4HZV7       | 7238  |
| B3MT80       | 7217  |
| B6NTD6       | 7739  |
| O95835       | 9606  |
| Q29CB7       | 46245 |
| Q56SE2       | 9615  |
| Q58FB8       | 7955  |
| Q641H7       | 8355  |
| Q8BYR2       | 10090 |
| Q9VA38       | 7227  |
| B3P7W4       | 7220  |
| B4PML7       | 7245  |
| Q24096       | 7227  |
| Q24590       | 7227  |
| B2RY46       | 10090 |
| Q5RIL6       | 7955  |
| B4GNB6       | 7234  |

| symbol PECAM1 |       |
|---------------|-------|
| A7LKP4        | 9796  |
| A8K3S7        | 9606  |
| B0CLW7        | 7955  |
| B1ARB1        | 10090 |
| B1ARB2        | 10090 |
| B1ARB3        | 10090 |
| B1MV75        | 9796  |
| B5X2G9        | 8030  |
| B7Z8Y6        | 9606  |
| P16284        | 9606  |
| P51866        | 9913  |
| P79390        | 9909  |
| Q08481        | 10090 |
| Q0VCP8        | 9913  |
| Q2TAE7        | 8355  |
| Q3SWT0        | 10116 |
| Q3TES6        | 10090 |
| Q4RLG1        | 99883 |
| Q5W5X8        | 8355  |
| Q8CAW4        | 10090 |
| Q922E0        | 10090 |
| Q95242        | 9823  |

## CLUSTERS

| symbol FOXD3 |       |
|--------------|-------|
| A2AD43       | 10090 |
| A2BDY3       | 10090 |
| A2CE80       | 7955  |
| A8Q3U6       | 6279  |
| B0UXI2       | 7955  |
| B2RRJ0       | 10090 |
| B3KVK3       | 9606  |
| B3MEK5       | 7217  |
| B3NNX7       | 7220  |
| B4H512       | 7234  |
| B4I8C7       | 7238  |
| B4J764       | 7222  |
| B4KSL2       | 7230  |
| B4LMW5       | 7244  |
| B4MJL9       | 7260  |
| B4P8L4       | 7245  |
| B4QI21       | 7240  |
| B7P2M9       | 6945  |
| B9EGF3       | 9606  |
| B9EGL7       | 9606  |
| O35392       | 10090 |
| O60548       | 9606  |
| O73782       | 7955  |
| P79770       | 9031  |
| P79772       | 9031  |
| P91587       | 7719  |
| Q02361       | 7227  |
| Q0PV86       | 7729  |
| Q12950       | 9606  |
| Q16676       | 9606  |
| Q16GR9       | 7159  |
| Q18694       | 6239  |
| Q28X48       | 46245 |
| Q3SYB3       | 9606  |
| Q3UQW8       | 10090 |
| Q4H3J2       | 7719  |
| Q4RJ48       | 99883 |
| Q4RUK2       | 99883 |
| Q4S2D4       | 99883 |
| Q502Q4       | 7955  |
| Q5JTX9       | 9606  |
| Q5M7L9       | 8364  |
| Q5VV16       | 9606  |
| Q60688       | 10090 |
| Q61060       | 10090 |
| Q61345       | 10090 |
| Q6DHP5       | 7955  |
| Q6F2E4       | 8364  |
| Q6NXD6       | 7955  |
| Q6VAE7       | 9598  |
| Q6VAE8       | 9598  |

| symbol FOXD3 |       |
|--------------|-------|
| Q6VAE9       | 9598  |
| Q6VAF0       | 9593  |
| Q6VAF2       | 9600  |
| Q6VAF3       | 9600  |
| Q6VB84       | 9606  |
| Q6VB85       | 9606  |
| Q6VB86       | 9606  |
| Q7Q419       | 7165  |
| Q8MUS6       | 7739  |
| Q8WXT5       | 9606  |
| Q90WN4       | 8355  |
| Q95YK7       | 51511 |
| Q98937       | 9031  |
| Q9DEN3       | 8355  |
| Q9DEN4       | 8355  |
| Q9NU39       | 9606  |
| Q9PSY4       | 8355  |
| Q9UJU5       | 9606  |

| symbol Klf5 |        |
|-------------|--------|
| Q9Z0Z7      | 10090  |
| B4DL96      | 9606   |
| Q13887      | 9606   |
| Q5T6X2      | 9606   |
| B4E2I1      | 9606   |
| A1XWJ7      | 9823   |
| A4IFB2      | 9913   |
| Q66HP1      | 10116  |
| Q9N1Y4      | 9986   |
| Q4KLU4      | 8355   |
| Q6DIM6      | 8364   |
| B8JL64      | 7955   |
| B6KXG3      | 7739   |
| B6NSW5      | 7739   |
| B7P607      | 6945   |
| Q2PHB0      | 218308 |
| B4LDI2      | 7244   |
| B4IZV3      | 7222   |
| B3NBY1      | 7220   |
| Q9VZN4      | 7227   |
| B4HTT2      | 7238   |
| B4PH49      | 7245   |
| B3M818      | 7217   |
| Q4H3A0      | 7719   |
| B4N578      | 7260   |
| B4KYB6      | 7230   |
| A7S781      | 45351  |
| B5DPM3      | 46245  |
| A2TJX0      | 9606   |
| Q923C0      | 10090  |

| symbol MYC |        |
|------------|--------|
| P01106     | 9606   |
| P23583     | 9598   |
| A1YG22     | 9597   |
| B8XIA5     | 9544   |
| P49033     | 9580   |
| A2T7L5     | 9600   |
| Q9MZT9     | 9395   |
| P49032     | 9483   |
| Q9MZU0     | 482537 |
| Q28566     | 9940   |
| Q9MZT7     | 9438   |
| Q28350     | 9615   |
| Q2HJ27     | 9913   |
| Q29031     | 9823   |
| Q9MZT8     | 9405   |
| B2RSN1     | 10090  |
| P01108     | 10090  |
| P09416     | 10116  |
| P68271     | 9685   |
| Q9MZT6     | 9988   |
| P22555     | 9995   |
| P01109     | 9031   |
| Q6P1T1     | 8364   |
| Q6NRN4     | 8355   |
| P15171     | 8355   |
| P06171     | 8355   |
| Q2TAU1     | 8355   |
| Q90342     | 7962   |
| Q90341     | 7962   |
| Q7ZVS9     | 7955   |
| B0UY64     | 7955   |
| P52160     | 7955   |
| Q2L4Q4     | 8022   |
| Q91421     | 8022   |
| P49709     | 7957   |
| Q9DGD0     | 7957   |
| Q3LFR6     | 31033  |
| Q9DFB9     | 7998   |
| Q589Y4     | 7741   |
| B6N4V3     | 7739   |
| B5THP1     | 10224  |
| A7RIE4     | 45351  |
| A8WFE7     | 9606   |
| B4E1N7     | 9606   |

CLUSTERS

| symbol GJA3 |        |
|-------------|--------|
| Q9Y6H8      | 9606   |
| B2RRM1      | 10090  |
| Q64448      | 10090  |
| P29414      | 10116  |
| Q9TU17      | 9940   |
| Q8JFD2      | 7955   |
| P41987      | 9913   |
| B0BM18      | 8364   |
| P29415      | 9031   |
| Q7ZYF9      | 8355   |
| Q532L5      | 8355   |
| Q4S8R0      | 99883  |
| P51915      | 29154  |
| B5X655      | 8030   |
| B5XFL7      | 8030   |
| B5X5N6      | 8030   |
| Q1HG93      | 61084  |
| Q9DGB5      | 143350 |
| Q6GLA5      | 8364   |
| Q8AWR4      | 7955   |
| B0R0X0      | 7955   |
| A7YYA8      | 7955   |
| B3DHP8      | 7955   |
| P51916      | 29154  |
| Q5TYP1      | 7955   |
| Q7T047      | 7955   |

| symbol KlF4 |       |
|-------------|-------|
| Q60793      | 10090 |
| Q923V7      | 10116 |
| B4YSE4      | 9823  |
| Q52JJ4      | 9823  |
| A7YWE2      | 9913  |
| Q4R355      | 9541  |
| B8XIA4      | 9544  |
| Q43474      | 9606  |
| Q28D29      | 8364  |
| A9X6Q5      | 7955  |
| B5X2J1      | 8030  |
| B5X3X7      | 8030  |
| B5X170      | 8030  |
| Q4H2J1      | 7719  |
| B7P1E1      | 6945  |
| B6MI74      | 7739  |
| B2RS60      | 10090 |
| Q13351      | 9606  |
| Q28BQ7      | 8364  |
| Q28D19      | 8364  |
| Q8QGW5      | 8355  |
| Q90XE7      | 7955  |
| Q90XS5      | 8355  |

| symbol KlF4 |       |
|-------------|-------|
| Q9DFS2      | 7955  |
| Q9ET58      | 10116 |
| Q9Y5W3      | 9606  |
| B4X5Z2      | 9823  |
| Q3V293      | 10090 |
| Q60843      | 10090 |
| B4YSE2      | 9823  |
| P46099      | 10090 |
| Q0P5B6      | 9913  |
| Q1RME5      | 10090 |
| Q3TZ82      | 10090 |
| Q2TAV3      | 8355  |
| Q7SZU5      | 8355  |
| Q8QGW6      | 8355  |
| Q1LX17      | 7955  |
| Q4RWQ1      | 99883 |
| Q6P3M5      | 7955  |
| Q90XE8      | 7955  |

| symbol DPP3 |        |
|-------------|--------|
| Q6CE11      | 4952   |
| A1CGS6      | 5057   |
| Q4WNL2      | 5085   |
| B0Y5F9      | 451804 |
| A7E778      | 325569 |
| B6HRY6      | 500485 |
| A1CY04      | 331117 |
| Q2UG48      | 5062   |
| B0S4Q0      | 245881 |
| A2QHM6      | 425011 |
| A4RMZ0      | 148305 |
| Q2HAE1      | 38033  |
| A6SI42      | 332648 |
| A5DBU3      | 4929   |
| A8NFG5      | 240176 |
| A3LRF8      | 4924   |
| Q5A8H6      | 5476   |
| Q6FWJ9      | 5478   |
| A5E5U5      | 379508 |
| Q6BWZ8      | 4959   |
| Q08225      | 4932   |
| B3LJ02      | 285006 |
| B5VRJ4      | 545124 |
| B8NA87      | 332952 |

| symbol DPP3 |        |
|-------------|--------|
| Q9NY33      | 9606   |
| Q5RCB1      | 9601   |
| O55096      | 10116  |
| Q8BU29      | 10090  |
| Q3THP1      | 10090  |
| Q99KK7      | 10090  |
| Q58CS3      | 9913   |
| B5X435      | 8030   |
| Q6DI20      | 7955   |
| Q6PA12      | 8355   |
| Q6DE90      | 8355   |
| B3S0Q5      | 10228  |
| Q298R2      | 46245  |
| B4K999      | 7230   |
| B4G4H0      | 7234   |
| B4LYY4      | 7244   |
| Q17GV2      | 7159   |
| B4JV57      | 7222   |
| B0WDL4      | 7176   |
| Q2XMY9      | 6239   |
| Q9U3K7      | 6239   |
| B3M0E9      | 7217   |
| B4PT52      | 7245   |
| B3P4Y4      | 7220   |
| Q1DZR2      | 5501   |
| B2VQV5      | 426418 |
| B8LTS2      | 441959 |
| Q5JPB8      | 9606   |
| B4DLX4      | 9606   |
| A7RZW4      | 45351  |
| Q9VHR8      | 7227   |
| Q8IGZ7      | 7227   |
| B4QYL5      | 7240   |
| B4HLK9      | 7238   |
| A9VAS0      | 81824  |
| Q5B559      | 162425 |
| Q6CUL1      | 28985  |
| Q756M5      | 33169  |
| B0CSE4      | 486041 |
| A7TI55      | 436907 |
| B6LUF4      | 7739   |
| Q7SH28      | 5141   |
| A6RH25      | 339724 |
| Q0UNF1      | 13684  |
| A6ZNF3      | 307796 |
| B4E357      | 9606   |
| Q3UDD5      | 10090  |
| Q3UDF3      | 10090  |
| Q6NXZ0      | 10090  |
| Q8C0I6      | 10090  |
| Q0CHM4      | 341663 |

## CLUSTERS

| symbol FGF3 |       |
|-------------|-------|
| P11487      | 9606  |
| Q8R5L9      | 10116 |
| Q0VG15      | 10090 |
| P05524      | 10090 |
| P48801      | 9031  |
| P36386      | 8355  |
| B7ZPF9      | 8355  |
| Q3KQ53      | 8355  |
| Q66IF7      | 8364  |
| P48802      | 7955  |
| B3DHR1      | 7955  |
| B5X6L5      | 8030  |
| A6H6W8      | 9913  |
| A7SG69      | 45351 |
| A7SI24      | 45351 |
| A8P371      | 6279  |
| A8Q0I7      | 6279  |
| B6KY19      | 7739  |
| B6M7K3      | 7739  |
| O15520      | 9606  |
| O35565      | 10090 |
| O35622      | 10090 |
| O42407      | 9031  |
| O43320      | 9606  |
| O54769      | 10116 |
| O60258      | 9606  |
| O76093      | 9606  |
| O88182      | 10116 |
| O89101      | 10090 |
| O95750      | 9606  |
| P03968      | 9913  |
| P03969      | 9913  |
| P05230      | 9606  |
| P08620      | 9606  |
| P09038      | 9606  |
| P10767      | 9606  |
| P11403      | 10090 |
| P12034      | 9606  |
| P12226      | 8355  |
| P13109      | 10116 |
| P15655      | 10090 |
| P15656      | 10090 |
| P19596      | 9031  |
| P21658      | 10090 |
| P21781      | 9606  |
| P31371      | 9606  |
| P36363      | 10090 |
| P36364      | 10116 |
| P37237      | 10090 |
| P48798      | 13616 |
| P48800      | 9031  |

| symbol FGF3 |       |
|-------------|-------|
| P48804      | 9031  |
| P48807      | 10116 |
| P54130      | 10090 |
| P55075      | 9606  |
| P61148      | 10090 |
| P61149      | 10116 |
| P61150      | 10116 |
| P61328      | 9606  |
| P61329      | 10090 |
| P63075      | 10090 |
| P63076      | 10116 |
| P70378      | 10090 |
| P70379      | 10090 |
| P70492      | 10116 |
| P79150      | 9615  |
| Q02195      | 10116 |
| Q11184      | 6239  |
| Q197G3      | 9031  |
| Q20FD0      | 9615  |
| Q28DZ3      | 8364  |
| Q2LGG1      | 7955  |
| Q5KRA4      | 9031  |
| Q5M7N7      | 8364  |
| Q5PRC3      | 7955  |
| Q5TKR1      | 7955  |
| Q641J3      | 8364  |
| Q6DFL4      | 8355  |
| Q6GLR6      | 8355  |
| Q6GLX1      | 8355  |
| Q6NZS6      | 7955  |
| Q6SJP8      | 7955  |
| Q76LI5      | 10116 |
| Q7ZZN4      | 9031  |
| Q8AY90      | 7955  |
| Q8I6J3      | 7719  |
| Q8I6J6      | 7719  |
| Q8R5L5      | 10116 |
| Q8R5L6      | 10116 |
| Q8R5L7      | 10116 |
| Q8R5L8      | 10116 |
| Q8VCY9      | 10090 |
| Q8VI79      | 10116 |
| Q8VI80      | 10116 |
| Q8VI81      | 10116 |
| Q8VI82      | 10116 |
| Q90722      | 9031  |
| Q92913      | 9606  |
| Q92914      | 9606  |
| Q92915      | 9606  |
| Q95L12      | 9823  |
| Q9DDN0      | 9031  |

| symbol FGF3 |       |
|-------------|-------|
| Q9EPC2      | 10090 |
| Q9ERW3      | 10116 |
| Q9ESL8      | 10090 |
| Q9ESL9      | 10090 |
| Q9ESS2      | 10090 |
| Q9EST9      | 10116 |
| Q9GZV9      | 9606  |
| Q9HCT0      | 9606  |
| Q9I950      | 9031  |
| Q9IAI3      | 9031  |
| Q9IAI5      | 9031  |
| Q9JN1       | 10090 |
| Q9NP95      | 9606  |
| Q9NSA1      | 9606  |
| Q9W6A1      | 9031  |
| A0AUQ1      | 7955  |
| A6P7H5      | 8355  |
| A6P7H6      | 8355  |
| A6QPP3      | 9913  |
| A8K1P5      | 9606  |
| B1AK18      | 9606  |
| B2R976      | 9606  |
| B3DHZ8      | 7955  |
| B7U3Y0      | 8364  |
| B7U3Y1      | 8364  |
| B7Z4M7      | 9606  |
| B7Z8N0      | 9606  |
| B8Y4H7      | 8364  |
| B8Y4H8      | 8364  |
| B8Y4H9      | 8364  |
| O89096      | 10090 |
| P70377      | 10090 |
| Q0IH3       | 8364  |
| Q3UR31      | 10090 |
| Q4RP64      | 99883 |
| Q4RVA8      | 99883 |
| Q5R5C0      | 9601  |
| Q5RDS9      | 9601  |
| Q5TKR2      | 7955  |
| Q5TKR3      | 7955  |
| Q5TKR4      | 7955  |
| Q5U3Q2      | 7955  |
| Q794I6      | 10116 |
| Q9W6A2      | 9031  |
| B5LX82      | 8355  |
| B7ZSQ9      | 8364  |
| Q07G49      | 8364  |
| Q5R2I6      | 13735 |
| Q6RX23      | 9863  |
| Q8QG59      | 8296  |
| Q95K97      | 9541  |

## CLUSTERS

| symbol FGF3 |       |
|-------------|-------|
| Q9N1B9      | 9940  |
| Q790L8      | 10090 |
| A2RTU5      | 10090 |
| B7ZLG4      | 9606  |
| B7ZMS7      | 10090 |
| Q0VF19      | 10090 |
| Q8C471      | 10090 |
| Q0VCA0      | 9913  |
| Q5SQB2      | 10090 |
| Q5TKR7      | 7955  |
| Q5TKR8      | 7955  |
| A8K147      | 9606  |
| B0CM87      | 9555  |
| B0KW92      | 9483  |
| B1MTE5      | 9523  |
| B2KI41      | 59479 |
| B2R5T0      | 9606  |
| B3DGE3      | 7955  |
| B3EX47      | 42254 |
| B4USY8      | 30611 |
| B7NZB1      | 9986  |
| B7U3X6      | 8364  |
| P34004      | 10036 |
| Q5NVQ3      | 9601  |
| Q6ZWS1      | 10090 |
| Q7M303      | 9940  |
| A4LBB8      | 9606  |
| P20003      | 9940  |
| P78443      | 9606  |
| Q4JH23      | 9940  |
| Q541T2      | 10090 |
| Q8QFR9      | 31033 |
| B7U3X7      | 8364  |
| B7U3X8      | 8364  |
| P48803      | 9913  |
| P48805      | 8355  |
| P48806      | 8355  |
| Q542N0      | 10090 |
| Q9DFC9      | 7955  |
| Q9YH31      | 8316  |
| Q5MFAQ8     | 13489 |
| Q5TLE1      | 7955  |
| Q8AXA1      | 7955  |
| Q9YGD8      | 8022  |
| A0MTF4      | 9913  |
| A2AXN8      | 9685  |
| Q8NF90      | 9606  |
| A6Y7S4      | 42716 |
| B7ZPK6      | 8355  |
| Q5FXK5      | 8022  |
| Q90Y92      | 8330  |

| symbol FGF3 |       |
|-------------|-------|
| Q925A3      | 10090 |
| B2MNVW3     | 9940  |
| P48808      | 9940  |
| Q4KL95      | 8355  |
| Q544I6      | 10090 |
| Q5D0X0      | 9860  |
| Q5RAY8      | 9601  |
| Q8C386      | 10090 |
| Q9N198      | 9823  |
| A8K427      | 9606  |
| A9CSE5      | 8410  |
| B2RPH5      | 9606  |
| B7UCP9      | 8364  |
| B7ZQK4      | 8355  |
| Q059W0      | 10090 |
| Q0KJ02      | 8090  |
| Q0KJ03      | 8090  |
| Q2HXX8      | 7955  |
| Q2LJ24      | 7955  |
| Q38PL0      | 7955  |
| Q3ZF15      | 42716 |
| Q499I9      | 10090 |
| Q91875      | 8355  |
| Q9PVY1      | 8355  |
| B3DJ36      | 7955  |
| B6EBS1      | 7959  |
| B7TIR5      | 38577 |
| O42278      | 7955  |
| O57341      | 7955  |
| Q0PJT5      | 7994  |
| Q3V279      | 10090 |
| Q4R0X9      | 9031  |
| Q805B2      | 7955  |
| Q80ZL6      | 10090 |
| Q8AXC5      | 8355  |
| Q8MJV6      | 9378  |
| Q9DE51      | 8296  |
| A1A514      | 9606  |
| A1A515      | 9606  |
| A2CF52      | 7955  |
| B8Q2W1      | 42716 |
| Q0E9Y8      | 7955  |
| A4IIV2      | 8364  |
| B1AU20      | 10090 |
| B5X194      | 8030  |
| Q0P4D2      | 7955  |
| Q5E9M0      | 9913  |
| Q5F291      | 10090 |
| Q5R8V8      | 9601  |
| Q9IAI7      | 9031  |
| B7Z1C3      | 9606  |

| symbol FGF3 |       |
|-------------|-------|
| Q3KNZ6      | 10090 |
| Q1XG75      | 7955  |
| Q4VBV7      | 7955  |
| Q8I6J1      | 51511 |
| B2RPH4      | 9606  |
| O60371      | 9606  |
| Q8N683      | 9606  |
| Q0VBJ8      | 10090 |
| Q3U1V5      | 10090 |



## CLUSTERS

| symbol FGFR2 |       |
|--------------|-------|
| A1YYN4       | 10090 |
| A1YYM9       | 10090 |
| A1YYN8       | 10090 |
| A1YYM4       | 10090 |
| A1YYN0       | 10090 |
| Q8MY86       | 6161  |
| Q8MY85       | 6161  |
| B3RWW1       | 10228 |
| A1YYM3       | 10090 |
| A1YYM5       | 10090 |
| A1YYM6       | 10090 |
| A1YYM7       | 10090 |
| A1YYM8       | 10090 |
| A1YYN2       | 10090 |
| A1YYN5       | 10090 |
| A1YYN7       | 10090 |
| A1YYP0       | 10090 |
| A1YYP1       | 10090 |
| A2BEU6       | 7955  |
| A4F228       | 8090  |
| A4F229       | 8090  |
| A4F230       | 8090  |
| A4F231       | 8090  |
| A4F236       | 8090  |
| A4F237       | 8090  |
| A4F238       | 8090  |
| A4F239       | 8090  |
| A4IFL5       | 9913  |
| A4JYQ2       | 7955  |
| B1WB19       | 8364  |
| B3DGB8       | 7955  |
| B3DGT9       | 7955  |
| B4DFC2       | 9606  |
| B4F6W5       | 8364  |
| B7ZR24       | 8355  |
| B7ZRE2       | 8355  |
| B7ZVT9       | 7955  |
| B7ZWP2       | 10090 |
| B9EKY4       | 10090 |
| O42127       | 8355  |
| P11362       | 9606  |
| P16092       | 10090 |
| P18460       | 9031  |
| P21804       | 9031  |
| P22182       | 8355  |
| P22455       | 9606  |
| P22607       | 9606  |
| Q03142       | 10090 |
| Q04589       | 10116 |
| Q1LY25       | 7955  |
| Q28GC1       | 8364  |

| symbol FGFR2 |       |
|--------------|-------|
| P21802       | 9606  |
| A1YYN9       | 10090 |
| P21803       | 10090 |
| A1YYN6       | 10090 |
| A5A754       | 9823  |
| P18461       | 9031  |
| Q90749       | 9031  |
| Q9TTZ3       | 9986  |
| Q9QVV7       | 10118 |
| Q91286       | 8319  |
| Q9TT07       | 9615  |
| Q8JG38       | 7955  |
| Q8AYP3       | 7955  |
| Q805B9       | 7955  |
| A4JYI8       | 7955  |
| A4QN31       | 7955  |
| A4IHW8       | 8364  |
| Q6GNP8       | 8355  |
| Q03364       | 8355  |
| Q91147       | 8316  |
| Q91150       | 8316  |
| Q2EKC1       | 7741  |
| Q9PSC9       | 8353  |
| Q9PSD1       | 8353  |
| Q95YM9       | 7729  |
| Q9GSH3       | 7729  |
| B3ND12       | 7220  |
| B3P0E3       | 7220  |
| B4MKJ8       | 7260  |
| B4NB61       | 7260  |
| Q09147       | 7227  |
| Q07407       | 7227  |
| A4V320       | 7227  |
| B4PI01       | 7245  |
| B4PL61       | 7245  |
| B4KV63       | 7230  |
| B4KCE2       | 7230  |
| B4HHC2       | 7238  |
| B4IBB0       | 7238  |
| B6MNZ3       | 7739  |
| Q28J96       | 8364  |
| Q3UPE1       | 10090 |
| Q498D6       | 10116 |
| Q4VBK2       | 7955  |
| Q5R8Q3       | 9601  |
| Q60818       | 10090 |
| Q60830       | 10090 |
| Q61563       | 10090 |
| Q61851       | 10090 |
| Q63709       | 10118 |
| Q63827       | 10116 |

| symbol FGFR2 |       |
|--------------|-------|
| Q6DD66       | 8355  |
| Q6GNS5       | 8355  |
| Q7TSI8       | 10090 |
| Q800Z1       | 7955  |
| Q8CFK8       | 10090 |
| Q8CIM9       | 10090 |
| Q90330       | 9091  |
| Q90413       | 7955  |
| Q90Z00       | 7955  |
| Q91287       | 8319  |
| Q91288       | 8319  |
| Q91742       | 8355  |
| Q91743       | 8355  |
| Q91897       | 8355  |
| Q95M13       | 9913  |
| Q99052       | 10090 |
| Q9D GK3      | 8355  |
| Q9I8X3       | 7955  |
| Q9JHX9       | 10116 |
| Q9PS96       | 8355  |
| Q9PSV8       | 8355  |
| Q9PSV9       | 8355  |
| Q9QZM7       | 10090 |
| Q91285       | 8319  |
| Q96KE5       | 9606  |
